1 **Integrin-alpha-6+ Stem Cells (ISCs) are responsible for whole body regeneration in**  
2 **an invertebrate chordate**

3

4 **Susannah H. Kassmer<sup>1</sup>, Adam Langenbacher<sup>2</sup> and Anthony W. De Tomaso<sup>1</sup>**

5

6 <sup>1</sup> Molecular, Cellular and Developmental Biology, University of California, Santa Barbara,  
7 CA USA. <sup>2</sup> Molecular, Cell, and Developmental Biology, University of California, Los  
8 Angeles, CA USA.

9 Susannah.kassmer@lifesci.ucsb.edu

10

11

12 **Abstract:**

13 Colonial ascidians are the only chordates able to undergo whole body regeneration  
14 (WBR), during which entire new bodies can be regenerated from small fragments of  
15 blood vessels. Here, we show that during the early stages of WBR in *Botrylloides*  
16 *diegensis*, proliferation occurs only in small, blood-borne cells that express *integrin-*  
17 *alpha-6 (IA6)*, *pou3* and *vasa*. Ablation of proliferating cells using Mitomycin C (MMC)  
18 blocks WBR in vascular fragments, but can be rescued by injection of cycling cells  
19 isolated from an untreated individual. Using prospective isolation and limit dilution  
20 analyses, we found that FACS-isolated IA6+ stem cells (ISCs) could rescue WBR in  
21 MMC treated vascular fragments, even when injecting only a single cell. Lineage tracing  
22 using EdU-labeling further revealed that donor-derived ISCs directly give rise to  
23 regenerating tissues. Inhibitors of either Notch or canonical Wnt signaling block WBR  
24 and reduce proliferation of ISCs, indicating that these two pathways regulate ISC  
25 activation.

26

1 **Introduction:**

2 The ability to regenerate missing structures is diverse and widespread among the  
3 metazoan phyla. Some invertebrate species within the phyla of Platyhelminthes,  
4 Cnidaria and Echinodermata, can regenerate whole bodies from small fragments of  
5 tissue, while some vertebrates such as amphibians and fish can regenerate ablated  
6 limbs and distal structures of some organs. In contrast, groups such as insects, birds  
7 and mammals have nearly lost the ability to regenerate (Li et al., 2015; Sanchez  
8 Alvarado, 2004; Sanchez Alvarado and Tsonis, 2006). Just like their general  
9 regeneration abilities, the cellular sources for regeneration are highly variable among  
10 regenerating species. In the Cnidarian *Hydractinia* and the Planarian *Schmidtea*,  
11 pluripotent stem cells are present in the adult and are responsible for regeneration, while  
12 in amphibians and zebrafish, lineage-committed progenitors arise from de-differentiation  
13 (Li et al., 2015; Sanchez Alvarado and Yamanaka).

14

15 In the majority of chordates, the ability to regenerate following a major injury is severely  
16 limited, usually resulting in scar formation. In contrast, a group of invertebrate chordate  
17 species; colonial ascidians of the genus *Botrylloides*, have been shown to regenerate  
18 whole bodies, including all tissues and organs, from small fragments of the vasculature.  
19 This process is called Whole Body Regeneration (WBR).

20

21 We are studying WBR in *Botrylloides diegensis*. Ascidians are the sister group of  
22 vertebrates, and begin life as a tadpole larvae with a typical chordate body plan.  
23 Following a free-swimming stage, the larvae settle and metamorphose into a sessile  
24 invertebrate adult, called a zooid. Zooids have a complex anatomy: they are filter  
25 feeders with siphons and a branchial basket, GI tract, central and peripheral nervous  
26 system, endocrine glands, a heart, and a circulatory system consisting of 8-12 blood cell

1 types. In colonial ascidian species, zooids reproduce asexually, and the adult body plan  
2 consists of a colony of clonally derived individuals embedded within a gelatinous  
3 structure called a tunic (Figure 1A). The source of the new bodies is a specialized region  
4 of the body wall of the parental zooid called the peribranchial epithelium, and this  
5 process of asexual reproduction is called palleal budding (Kassmer et al., 2018).  
6 Asexual regeneration results in an ever-expanding number of zooids, embedded in the  
7 tunic, and linked by a common, extracorporeal vasculature (Figure 1A). This vascular  
8 bed extends beyond and encircles the zooids, and at the periphery of the colony  
9 terminates in structures called ampullae (Figure 1A).

10 In addition to palleal budding, which occurs normally, *B. diegensis* can also use the  
11 alternative WBR pathway to produce a zooid following injury. WBR occurs in the  
12 vasculature, and is initiated by surgical removal of all zooids, or separation of small  
13 vascular fragments from the rest of the colony (Figure 1B). WBR progresses through  
14 distinct visual stages. For the first 24 hrs following surgical ablation, the blood vessels  
15 undergo regression and remodeling (stage 1, Figure 1B). During this time, blood flow,  
16 usually powered by the hearts of each zooid, continues and is driven by contractions of  
17 the remaining ampullae (Blanchoud et al., 2017). During the next 48 hrs, the blood  
18 vessels continue to remodel and form a dense, contracted network (stage 2, Figure 1B).  
19 Within this dense, highly pigmented vascular tissue, an opaque mass of non-pigmented  
20 cells becomes apparent; creating a clear area that is the presumptive site of bud  
21 development (stage 3, arrow in Figure 1B). The mass of cells next forms into a hollow,  
22 blastula-like epithelial sphere. The vascular epithelium then wraps itself around this  
23 sphere, leading to the formation of a distinct visible double vesicle. Over the next 48h,  
24 the inner vesicle increases in size (Stage 4, Figure 1B), while undergoing a series of  
25 invaginations and evaginations that lead to organogenesis and the eventual  
26 regeneration of a zooid. WBR is defined as complete when the new zooid is actively

1 filter-feeding, and occurs within a range of 7-10 days (stage 5; Figure 1B). The zooid  
2 immediately commences normal pallear budding, and the colony regrows.

3

4 In the present study, we aimed to assess the cellular origins of WBR in *Botrylloides*  
5 *diegensis*, specifically the role of circulatory cells in this process. WBR has been studied  
6 in three different species of botryllid ascidians, and in all cases a population of cells with  
7 an undifferentiated appearance, termed hemoblasts, have been suggested to initiate this  
8 regenerative process (Brown et al., 2009a). In *Botrylloides violaceus*, 15-20 small  
9 hemoblasts that express Piwi protein have been shown to aggregate under the  
10 epidermis of a blood vessel during early WBR (Oka, 1959). These cells can be detected  
11 during the early vesicle stage and occasionally within the epithelium of a vesicle,  
12 suggesting that they play a role in regeneration (Brown et al., 2009a). In a related  
13 species, *Botrylloides leachii*, Blanchoud et al. showed an increase in the population of  
14 hemoblasts very early after injury during WBR (Blanchoud et al., 2017). These results  
15 had suggested that blood borne stem cells might play a role in WBR in *Botrylloides*, but  
16 to date, it has never been directly tested whether such cells give rise to regenerating  
17 tissues.

18

19 In several species of colonial ascidians, the blood contains self-renewing, lineage  
20 restricted germline stem cells that migrate to newly developing buds during repeated  
21 cycles of asexual reproduction, where they give rise to eggs and testes (Brown et al.,  
22 2009b; Carpenter et al., 2011; Kawamura and Sunanaga; Laird et al., 2005; Rodriguez  
23 et al., 2016; Sunanaga et al., 2010; Sunanaga et al., 2006). In *Botryllus schlosseri*, these  
24 germline stem cells can be enriched by flow cytometry using Integrin-alpha-6 (IA6) as a  
25 marker (Kassmer SH, 2015) and express *piwi* as well as other genes associated with  
26 germ cells, such as *vasa*, and *pumilio* (Brown et al., 2009b; Langenbacher and De



1 *Tomaso, 2016; Sunanaga et al., 2006*). Since *vasa* and *piwi* are part of the germline  
2 multipotency program (Juliano et al., 2010), and IA6 is a biomarker for various kinds of  
3 mammalian stem cells, including embryonic stem cells and primordial stem cells  
4 (Krebsbach and Villa-Diaz, 2017), we hypothesized that IA6 might likewise be expressed  
5 on blood borne stem cells that are involved in WBR in *Botrylloides*.

6  
7 In order to isolate the cells responsible for WBR, we developed a rescue assay and used  
8 a prospective isolation strategy to identify the cells that give rise to regenerating tissues.  
9 We show that during the very early stages of WBR in *B. diegensis*, cell proliferation  
10 occurs only in blood-borne cells that express *integrin-alpha-6*, *pou3*, *vasa* and *piwi*. IA6+  
11 cells are required for WBR and lineage tracing using EdU labeling reveals that they  
12 directly give rise to regenerating tissues. Finally, we show that proliferation of IA6+ cells  
13 during WBR is regulated by Notch and Wnt signaling.

14

## 15 **Results:**

16 The majority of proliferating cells during early stages of WBR express Integrin-alpha-6,  
17 vasa and pou3.

18 To assess whether Integrin-alpha-6 enriches for cells expressing stem cell-associated  
19 genes in *B. diegensis*, we isolated IA6+ cells from the blood of control genotypes by flow  
20 cytometry and quantified the expression of germline pluripotency genes such as *vasa*,  
21 *piwi1*, *piwi2* and *pou3*. For the latter, we hypothesize that the octamer binding  
22 transcription factor Pou3 plays a role in stem cell pluripotency in ascidians, similar to  
23 Oct4 in mammalian pluripotent cells. Oct4 is a member of the Pou class 5 gene family; a  
24 vertebrate specific family of pou genes (Sanchez Alvarado and Yamanaka; Shi and Jin,  
25 2010). It is likely that *pou5* inherited this function from an ancestral *pou* paralog (Gold et  
26 al., 2014), and in the cnidarian *Hydractinia echinata*, *pou3* plays a role in stem cell

1 pluripotency (Millane et al., 2011). We cloned *pou3* from *B. diegensis* and *B. schlosseri*  
2 and constructed a phylogenetic tree that confirms the close relationship of *pou3* to *pou5*  
3 (Figure S1). *Pou3* is expressed in the developing germline of palaeal buds in *B. diegensis*  
4 colonies (Figure S1), and *vasa* and *pou3* are highly expressed in IA6+ cells isolated from  
5 the blood (Figure 1C). Previously, only one *piwi* gene had been reported in *B. leachii*  
6 (Rinkevich et al., 2010), but we found that, like most animals, *Botrylloides diegensis* has  
7 two *piwi* genes (Juliano et al., 2011; Seto et al., 2007). Only *piwi2* is expressed in IA6+  
8 cells, at lower levels than *vasa* (Figure 1C). Using double-labeled FISH, we confirmed  
9 that 81% of either *ia6+* or *pou3+* cells co-express both genes, while 9 and 10% express  
10 only *pou3* or *ia6*, respectively (Figure 1E). The overlap between *vasa* and *pou3* is 87%  
11 (Figure 1D).

12  
13 To assess whether *ia6+* *pou3+* cells are involved in responding to injury, we analyzed  
14 the expression of these two genes in proliferating cells during the early time points after  
15 surgical separation of blood vessels from the colony. We used *Histone 3* mRNA  
16 expression as a marker of proliferating cells, as it is upregulated in S-phase of the cell  
17 cycle in plants and animals, and has been used as a marker for cell proliferation in in situ  
18 hybridization previously (Arakura et al., 2001; Gown et al., 1996; Langenbacher et al.,  
19 2015; Meshi et al., 2000; Osley, 1991). Analyzing expression of *histone 3* (*h3*) together  
20 with *integrin-alpha-6* by double fluorescent in situ hybridization (FISH), we found that  
21 90% of all *ia6+* cells proliferate in the blood of a healthy colony (stage 0, Figure 2 A and  
22 B). After separation of blood vessels from the colony, the overlap between *h3* and *ia6*  
23 stays high during stages 1 and 2 (86% and 92%, respectively, (Figure 2A and Figure  
24 S1E), and the total number of proliferating *ia6+h3+* cells increases dramatically (Figure  
25 2A, compare stage 0 and 2). Furthermore, *ia6+* cells make up the majority of  
26 proliferating cells during the early stages of WBR, as the number of *h3* single positive

1 cells is consistently much lower than that of *ia6+h3+* double positives in stages 0, 1 and  
2 2 (Figure 2B). During stages 1 and 2, some *ia6+* cells aggregate (white arrows in Figure  
3 2, Stage 2), a structure that we refer to as regeneration foci. Cells in the aggregates  
4 continue to proliferate, and the structure increases in size (Figure 2, Stage 3, yellow  
5 arrows). The aggregate next begins to form the epithelial sphere (Figure 2, Stage 3, red  
6 arrows), which will eventually form the zoid. As the aggregates increase in size, a  
7 concurrent drop in IA6 expression can be seen (Figure 2, Stage 3, yellow arrows) and by  
8 early vesicle phase there is almost no IA6 expression (Figure 2, Stage 3, red arrows).  
9 This is likely a sign of differentiation of these cells. In contrast, IA6+ cells that are not  
10 present in developing epithelial spheres continue to proliferate (Figure 2A,B).

11

12 Analyzing expression of *h3* and *pou3* by double FISH, we found that proliferating cells in  
13 the blood of *Botrylloides* express *pou3* in uninjured steady state and during the early  
14 stages of regeneration (Figure S2). 91% of all *pou3+* cells proliferate in steady state, and  
15 this percentage stays high during stages 1 and 2. By stage 3, 64% of *pou3+* cells  
16 become quiescent, and cell proliferation is predominant (71%) in *pou3-* regenerating  
17 double vesicles (yellow arrows in Figure S2, stage 3) and blood cells (Figure S2, stage  
18 3). Together, these results show that *ia6+pou3+* cells proliferate in steady state and  
19 make up the majority of proliferating cells during the early stages of WBR. Based on  
20 these findings, we hypothesize that *ia6+pou3+* proliferating cells are stem cells  
21 responsible for WBR.

22

23 IA6+ cells are required for regeneration:

24 To functionally assess whether proliferating IA6+ cells are involved in whole body  
25 regeneration, we ablated proliferating cells using the drug Mitomycin C (MMC). Vascular  
26 tissue was soaked in MMC immediately after surgery and treated for 24h until stage 1,

1 when overlap between IA6 and the proliferation marker histone 3 is 93% (Figure 2). In  
2 MMC treated vessels at 5 days post treatment, no *pou3+* or *histone3+* cells remain  
3 (Figure S3A). Elimination of proliferating cells with Mitomycin C at stage 0-1 results in  
4 subsequent loss of regenerative capacity (Figure 3A). Normally, regeneration is  
5 complete after 11-14 days (Figure 1), but MMC treated samples do not reach stage 4 or  
6 stage 5 even after 20 days (Figure 3A), and most MMC treated blood vessels appear to  
7 be permanently arrested in stage 2 (Figure 3A). However, regeneration can be rescued  
8 in MMC treated vasculature by injection of 2000 total blood cells isolated from an  
9 untreated, healthy individual, demonstrating that WBR depends on blood borne cells  
10 (Figure 3B). To identify the population of cells responsible for this rescue, we injected  
11 different populations of cells isolated by flow cytometry and assessed rescue of WBR  
12 (Figure 3C). We initially compared cells in the G2/M phase of the cell cycle versus those  
13 in G0, and found that 50 cycling cells could rescue regeneration, while 50 G0 cells could  
14 not. We next compared IA6+ and IA6- populations. While 50 IA6- cells are not able to  
15 rescue WBR, injection of 1000 IA6- cells achieved a 57% rescue efficiency (Figure 3C).  
16 This could be due to cell-sorting impurities or it could suggest that a rare population of  
17 IA6- stem cells exists (about 1/2000), which is supported by the finding that almost 20%  
18 of *pou3+* cells are *ia6-* (Figure 1E). In contrast, 90% rescue is achieved by injecting only  
19 50 IA6+ cells (Figure 3C). We next carried out limiting dilution analyses of the IA6+  
20 population, and found that injection of a single IA6+ cell isolated from the blood of a  
21 healthy animal can rescue whole body regeneration in 20% of MMC treated samples  
22 (Figure 3C). Using ELDA analysis software (Hu and Smyth, 2009), we calculated the  
23 estimated frequency of IA6+ cells capable of rescuing WBR to be about 1 in 7.55 (upper  
24 estimate 4.63, lower estimate 12.3). These results show that IA6+ cells can  
25 independently rescue WBR.

26

1 IA6+ Stem Cells (ISCs) give rise to regenerating tissues in developing bodies:

2 Since ISCs appear to be functionally required for WBR, we wanted to assess whether  
3 progeny from IA6+ cells is incorporated into regenerating tissues. We used EdU to label  
4 IA6+ cells in steady state in an intact animal and subsequently track the presence of  
5 their progeny in regenerating tissues by transplanting them into MMC treated vessel  
6 fragments. The modified thymidine analogue EdU is incorporated into newly synthesized  
7 DNA and detected in fixed tissues using a fluorescent dye. We ensured that EdU could  
8 be detected at stage 3 of WBR in vessels injected with EdU at stage 0 (Figure 4,  
9 middle), while uninjected samples showed no signal (Figure 4, left). IA6+ cells were  
10 isolated from donor animals that had been injected with EdU the day before to allow EdU  
11 incorporation into the DNA of cycling cells. EdU-labeled IA6+ cells were injected into  
12 MMC treated recipients as in the rescue experiments described above. When recipients  
13 reached stages 2-4 of WBR, the regenerating tissues were fixed and stained for EdU  
14 (Figure 4, right). By stage 2, EdU+ cells were found in cell aggregates of regeneration  
15 foci (Figure 4, right) as well as in circulation (Figure S3). Examples of three independent  
16 experiments are shown in Figure S3, At Stage 4, EdU+ cells could be identified in the  
17 epithelia of the regenerating body that are undergoing morphogenesis (Figure S3B,  
18 white arrows). In one case, we also saw EdU+ cells either part of or directly underneath  
19 the outer epithelium of the regenerating body (Figure S3B, green arrow). These results  
20 show that IA6+ cells are the source of regenerating tissues in newly developing bodies.

21

22 Inhibition of Notch or Wnt signaling blocks regeneration and proliferation of ISCs:

23 We next aimed to analyze the expression of components of the Notch and Wnt signaling  
24 pathways in proliferating cells from the blood during the early time points of WBR. These  
25 pathways are known to play roles in regulating stem cell activity, proliferation of  
26 blastema cells and cellular differentiation in other organisms (Grotek et al., 2013;

1 Hamada et al., 2015; Kawakami et al., 2006; Perdigoto and Bardin, 2013; Reya and  
2 Clevers, 2005; Tal et al., 2010; Vogg et al., 2016; Wehner et al., 2014) and are  
3 upregulated during WBR in *Botrylloides* (Zondag et al., 2016). We isolated cycling G2/M  
4 cells by flow cytometry from stage 0 as well as at 24h and 48h after injury of vessel  
5 fragments. We specifically isolated G2/M cells instead of IA6+ cells in order to be able to  
6 analyze gene expression in all proliferating blood cells, even those that may have begun  
7 to down-regulate IA6 as they differentiate (Figure 2). As expected, G2/M cells isolated  
8 from the blood of healthy, unmanipulated animals (0h), express high levels of *ia6*,  
9 mitosis-specific *cyclin b*, and *pou3* (Figure 5A). *Notch 1*, *notch 2* and the downstream  
10 gene *hes1*, as well as the Wnt pathway components *frizzled5/8*, *disheveled* and *beta*  
11 *catenin*, are also expressed, indicating active Notch and Wnt signaling in proliferating  
12 circulating cells from control individuals (Figure 5B). 24h after injury, *notch2*, *frizzled 5/8*  
13 are upregulated in G2/M cycling cells compared to 0h. 48h after injury, *notch2*, *pou3* and  
14 *frizzled 5/8* are even more highly upregulated. *Notch1* is downregulated at 24h and 48h  
15 (Figure 5C). *Piwi2* is highly upregulated in cycling G2/M cells at 48h together with *vasa*  
16 (Figure S4). These results show that the pluripotency/stem cell related genes *pou3*, *ia6*,  
17 *piwi2* and *vasa* are highly expressed in cells that proliferate during the early stages of  
18 WBR. Double FISH for *notch1* and *h3* shows that *notch1*+ cells proliferate during stage 0  
19 and stage 1, but fewer of these cells are present in stage 2 (Figure 6A). However, the  
20 number of *notch2*+ cells increases by stage 2 (Figure 6A). These results suggest that  
21 *notch1* is primarily responsible for regulating proliferation of ISCs during steady state  
22 and at early time points post injury. In Stage 2, *notch1*-positive cells are more quiescent  
23 and fewer in number. At the same time, *notch2* is expressed in a higher proportion of  
24 proliferating cells. This could be related to a role of *notch2* in regulating proliferation of  
25 differentiating progenitors, while *notch1* is associated with stem cell maintenance.

26

1 To assess whether Notch or Wnt signaling are required for WBR, vessel fragments were  
2 allowed to regenerate in the presence of inhibitors of either Notch (DAPT) or Wnt  
3 signaling (Endo-IWR). Inhibition of either Notch or canonical Wnt signaling blocked  
4 regeneration in a dose dependent manner (Figure 6B). In either 2uM of the Notch-  
5 signaling inhibitor DAPT or 1uM of the canonical Wnt signaling inhibitor Endo-IWR, the  
6 vessel tissue underwent remodeling up to stage 2 in both treatments, but never  
7 progressed beyond stage 2 while kept in drug (for up to 4 weeks), and appeared  
8 otherwise healthy and alive. Upon removal of the inhibitors (after 96h of treatment),  
9 regeneration progressed normally (14/15 samples reached stage 5 for IWR and 15/16  
10 for DAPT, Figure 6B), indicating that regeneration is only halted, but that all cell types  
11 required for WBR are still viable and fully functional. As controls, we used Exo-IWR  
12 which is a 25-fold less active against the Wnt/ $\beta$ -catenin pathway, and the gamma-  
13 secretase modulator E2012, which does not affect the Notch specific gamma-secretase.  
14 Both control drugs Exo-IWR (1uM) and E2012 (1uM) did not affect regeneration rates  
15 (Figure 6B).

16

17 We next assessed for the presence of proliferating cells in drug treated vessel fragments  
18 using double FISH for *h3* and *pou3*. Following 72h of treatment, fewer *pou3*-positive  
19 cells are present in drug treated vessels compared to controls (Figure 6C), and  
20 regeneration foci do not form. Of the few *pou3*+ cells that remain, very few (Notch  
21 inhibitor) to none (Wnt inhibitor) are proliferating. We conclude that inhibition of signaling  
22 downstream of Wnt and Notch receptors blocks ISCs from entering the cell cycle, and  
23 pushes them towards quiescence. Because ISCs remain quiescent, they are unable to  
24 form regeneration foci. Inhibition of Notch or Wnt signaling likely also affects  
25 differentiation of ISCs, as there are much fewer proliferating *pou3*- cells compared to  
26 controls. Yet, upon removal of the inhibitors, ISCs are able to exit quiescence and to

1 resume proliferation and differentiation normally. In addition, whatever cell type is  
2 producing the Wnt and Notch ligands is still capable of doing so when the inhibitors are  
3 removed. Together, these results show that WBR depends on both Wnt and Notch  
4 signaling, and that both signaling pathways control the response of ISCs to injury and  
5 affect their proliferation and differentiation.

6

7 **Discussion:**

8

9 Here, we provide definitive functional evidence that blood-borne stem cells are  
10 responsible for injury induced whole body regeneration (WBR) and give rise to  
11 regenerating tissues in an invertebrate chordate. These cells belong to  
12 the undifferentiated “hemoblast” population that has been described historically in the  
13 blood of colonial ascidians (Brown and Swalla, 2012) (Kawamura and Sunanaga) and  
14 has been implicated in whole body regeneration in previous descriptive studies (Brown  
15 et al., 2009a; Oka, 1959).

16

17 At the level of a single cell, we have found that IA6+ Stem Cells (ISCs) can give rise to  
18 regenerating tissues during WBR, and that WBR cannot proceed when ISCs are  
19 ablated. We show that ISCs are constantly dividing in steady state and express genes  
20 associated with pluripotency, such as *pou3*. ISCs also express germ plasm components  
21 such as *vasa* and *piwi*, yet we have shown that they directly give rise to somatic tissues  
22 during WBR. So far, we have developed two main hypotheses about the nature of these  
23 cells.

24 The first hypothesis is that *Botrylloides* maintains a pluripotent stem cell used for WBR.  
25 In several other invertebrate species, germ plasm components such as *vasa*, *nanos* and  
26 *piwi* are expressed in cells which have somatic potential and have therefore been  
27 defined as germline multipotency (GMP) genes (Juliano et al., 2010). These GMP



1 expressing cells are called Primordial Stem Cells and are part of the germline and can  
2 be involved in asexual reproduction in some animals (Solana, 2013). Examples of germ  
3 plasm containing cells that also give rise to somatic tissues include small micromeres  
4 from sea urchins, neoblasts in planarians, i-cells in hydrozoan cnidarians and  
5 archeocytes in sponges (Juliano et al., 2014; Millane et al., 2011; Reddien, 2018;  
6 Reddien and Sanchez Alvarado, 2004; Voronina et al., 2008; Wagner et al., 2011;  
7 Yajima and Wessel, 2011). One hypothesis is that that at least a subset of ISC's might  
8 be similar to these types of primordial stem cells, and maintain somatic potential. Both  
9 the low frequency of rescue of single IA6 cell transplants, and the rare IA6- cells that  
10 also can rescue suggest that there is underlying heterogeneity in these cell populations.

11

12 Another hypothesis is that a normally lineage restricted germline progenitor is triggered  
13 to proliferate and differentiate into somatic tissues under certain conditions, such as loss  
14 of all zooids. This process might be somewhat similar to teratoma formation in  
15 mammals. Teratomas are germ cell tumors that contain an assortment of tissue  
16 structures from all three germ layers: endodermal, mesodermal, and ectodermal. These  
17 tumors are derived from primordial germ cells that migrate to ectopic sites during  
18 embryogenesis and differentiate into somatic cell types. In *Botrylloides*, the mechanisms  
19 that normally restrict circulatory germline progenitors to germ cell fate might be  
20 temporarily lifted following injury and subsequent whole body regeneration. *Vasa*-  
21 positive germline stem cells have been described in the blood of several botryllid  
22 ascidians and persist throughout adult life (Brown and Swalla, 2007; Kawamura and  
23 Sunanaga, 2011; Sunanaga et al., 2007). In *B. schlosseri*, we have shown that these  
24 cells are lineage restricted and give rise to new gonads during repeated rounds of  
25 asexual reproduction (Brown et al., 2009b; Carpenter et al.; Laird et al., 2005), and can  
26 be isolated based on expression of IA6 (Kassmer et al., 2015). While we have not

1 functionally demonstrated that IA6+ cells in *B. diegensis* are lineage restricted (*B.*  
2 *diegensis* is not constantly fertile in lab-reared conditions), they express equivalent  
3 pluripotency genes. Thus, upon separation of vessels from bodies in *Botrylloides*, the  
4 pluripotency of IA6+ cells may be utilized for somatic regeneration. In contrast, all  
5 somatic tissues that are formed during asexual reproduction (palleal budding) in healthy  
6 animals are derived from the peribranchial epithelium of the parental zooids and not from  
7 blood borne cells (Berrill, 1947; Brown and Swalla, 2012; Carpenter et al., 2011; J.,  
8 1951; Oka, 1959).

9

10 In a large-scale gene expression study, Zondag et al. showed that Wnt and Notch  
11 signaling components are upregulated during early stages of regeneration in *B. leachii*  
12 (Zondag et al., 2016). Here, we show that these pathways are required for proliferation  
13 and possibly maintenance of ISCs. Both of these pathways have been shown to play  
14 roles in regulating regeneration and stem cell proliferation in several other regenerating  
15 species (Sanchez Alvarado and Tsonis, 2006), and Wnt signaling is required for  
16 blastema formation (Kawakami et al., 2006) and stem cell maintenance (Reya and  
17 Clevers, 2005). Notch regulates blastema cell proliferation during zebrafish fin  
18 regeneration, and it mediates cell fate decisions such as proliferation and differentiation  
19 in many stem cell types (Perdigoto and Bardin, 2013). Notch also regulates blastema  
20 formation during distal regeneration in the solitary ascidian *Ciona* (Hamada et al., 2015).  
21 Future studies will investigate which Notch and Wnt ligands are expressed by the  
22 regeneration niche in *Botrylloides*, and how and when these signaling pathways act on  
23 ISCs to regulate proliferation and differentiation.

24

25 In summary, we have identified a stem cell population responsible for whole body  
26 regeneration in a chordate species, *Botrylloides diegensis*, and developed the toolsets

1 necessary for future detailed molecular analysis of the stem cells involved in WBR and  
2 the pathways that regulate their function.

3

4

5 **Methods:**

6

7 Animals

8 *Botrylloides diegensis* colonies used in this study were collected in Santa Barbara, CA  
9 and allowed to attach to glass slides. Colonies were maintained in continuously flowing  
10 seawater at 19-23°C and cleaned with soft brushes every 14 days.

11

12 Whole body regeneration

13 Under a stereo dissection microscope, blood vessel fragments were surgically separated  
14 from the rest of the colony using razor blades. Regenerating fragments were kept  
15 attached to slides in flowing filtered seawater at 19-23°C.

16

17 Integrin-alpha 6 and cell cycle flow cytometry

18 Genetically identical, stage matched samples were pooled, and blood was isolated by  
19 cutting blood vessels with a razor blade and gentle squeezing with the smooth side of a  
20 syringe plunger. Blood was diluted with filtered seawater and passed through 70 µm and  
21 40 µm cell strainers. Anti-Human/Mouse-CD49f-eFluor450 (Ebioscience, San Diego, CA,  
22 USA, cloneGoH3) was added at a dilution of 1/50 and incubated on ice for 30 min and  
23 washed with filtered seawater. For cell cycle sorting, Vybrant Dye Cycle Ruby Stain  
24 (Thermo Fisher Scientific, Waltham, MA, USA) was added at a dilution of 1/100 and  
25 incubated for 30 minutes at room temperature. Fluorescence activated cell sorting  
26 (FACS) was performed using a FACSAria (BD Biosciences, San Jose, CA, USA) cell

1 sorter. A live cell gate was selected based on forward/side scatter properties, and  
2 samples were gated IA6 (CD49f)-positive or –negative based on isotype control staining  
3 (RatIgG2A-isotype-control eFluor450, Ebioscience, San Diego, CA, USA). Analysis was  
4 performed using FACSDiva software (BD Biosciences, San Jose, CA, USA). Cells were  
5 sorted using high-pressure settings and a 70  $\mu\text{m}$  nozzle and collected into filtered  
6 seawater.

7

### 8 Quantitative RT PCR

9 Sorted cells were pelleted at 700g for 10min, and RNA was extracted using the  
10 Nucleospin RNA XS kit (Macherey Nagel, Bethlehem, PA, USA), which included a  
11 DNase treatment step. RNA was reverse transcribed into cDNA using random primers  
12 (Life Technologies, Carlsbad, CA, USA) and Superscript IV Reverse Transcriptase (Life  
13 Technologies, Carlsbad, CA, USA). Quantitative RT-PCR (Q-PCR) was performed using  
14 a LightCycler 480 II (Roche Life Science, Penzberg, Germany) and LightCycler DNA  
15 Master SYBR Green I detection (Roche, Penzberg, Germany) according to the  
16 manufacturers instructions. The thermocycling profile was 5 min at 95, followed by 40  
17 cycles of 95 °C for 10 sec, 60 °C for 10 sec. The specificity of each primer pair was  
18 determined by BLAST analysis (to human, *Ciona* and *Botryllus* genomes), by melting  
19 curve analysis and gel electrophoresis of the PCR product. Primer sequences are listed  
20 in the Supplemental file “primer sequences”. Relative gene expression analysis was  
21 performed using the  $2^{-\Delta\Delta\text{CT}}$  Method. The CT of the target gene was normalized to the CT  
22 of the reference gene *actin* :  $\Delta\text{C}_T = \text{C}_T(\text{target}) - \text{C}_T(\text{actin})$ . To calculate the normalized  
23 expression ratio, the  $\Delta\text{C}_T$  of the test sample (IA6-positive cells) was first normalized to  
24 the  $\Delta\text{C}_T$  of the calibrator sample (IA6-negative cells):  $\Delta\Delta\text{C}_T = \Delta\text{C}_T(\text{IA6-positive}) - \Delta\text{C}_T(\text{IA6-negative})$ .  
25 Second, the expression ratio was calculated:  $2^{-\Delta\Delta\text{CT}} = \text{Normalized expression ratio}$ . The  
26 result obtained is the fold increase (or decrease) of the target gene in the test samples

1 relative to IA6-negative cells. Each qPCR was performed at least three times on cells  
2 from independent sorting experiments gene was analyzed in duplicate in each run. The  
3  $\Delta C_T$  between the target gene and *actin* was first calculated for each replicate and then  
4 averaged across replicates. The average  $\Delta C_T$  for each target gene was then used to  
5 calculate the  $\Delta\Delta C_T$  as described above. Data are expressed as averages of the  
6 normalized expression ratio (fold change). Standard deviations were calculated for each  
7 average normalized expression ratio (n=6).

8

#### 9 Mitomycin C treatment and rescue

10 Vessel fragments were cut and soaked in 60 $\mu$ M Mitomycin C (Tocris, Bristol, UK) in  
11 filtered seawater for 24 hours. MMC was removed and fragments were returned to  
12 flowing seawater for 24 hours before being micro-injected with cells (different numbers of  
13 IA6+, IA6-, G0 or G2M, as indicated) isolated from the blood of normal, healthy colonies.  
14 Rescue efficiency (number of fragments reaching stage 5) was scored after 20 days.

15

#### 16 Fluorescent *in situ* hybridization on cryosections

17 Vessel fragments at different stages of regeneration were fixed overnight in 4%  
18 paraformaldehyde in PBS at room temperature. Samples were washed in PBS and  
19 soaked in 15% and 30% sucrose for 30 minutes each before embedding in OCT  
20 medium. 20 $\mu$ m sections were cut using a Leica cryostat. Fluorescent *in situ* hybridization  
21 was adapted from <sup>(Langenbacher et al.)</sup> for cryosections. Briefly, *B. leachii* homologs of genes  
22 of interest were identified by tblastn searches of the *B. leachii* EST database  
23 ([https://www.aniseed.cnrs.fr/aniseed/default/blast\\_search](https://www.aniseed.cnrs.fr/aniseed/default/blast_search)) using human or Ciona (when  
24 available) protein sequences. Primer pairs were designed to amplify a 500-800 bp  
25 fragment of each transcript (Primer sequences are listed in the Supplemental file “primer  
26 sequences”). PCR was performed with Hotstar DNA Polymerase (Qiagen Germantown,

1 MD 20874) and products were cloned into the pGEM-T Easy vector (Promega, Madison,  
2 WI, A1360). *In vitro* transcription was performed with SP6 or T7 RNA polymerase  
3 (Roche, Penzberg, Germany 10810274001, 10881767001) using either digoxigenin,  
4 fluorescein or dinitrophenol labeling. Cryosections were air-dried and fixed with 4% PFA  
5 for 10 minutes and washed with PBS/1%Triton-X-100. Probes were diluted in  
6 hybridization buffer and hybridized at 65 C for 30 minutes. Probes were removed and  
7 slides washed with 2xSSC/1%Triton and 0.2xSSC/1%Triton for 15 minutes each at 65C.  
8 HRP-conjugated anti-digoxigenin antibody (Roche 1/1000), HRP-conjugated anti-  
9 fluorescein antibody (Roche 1/500) or unconjugated anti-DNP antibody (Vector labs  
10 1/100) followed by anti-rabbit-HRP (Abcam, Cambridge, UK, 1/200) were used to detect  
11 labeled probes. Fluorophore deposition was performed by incubating slides for 20  
12 minutes at RT in Tyramides (Alexa488-Tyramide, Alexa-555 Tyramide or Alexa-594-  
13 Tyramide, all from Thermo Fisher) diluted 1/100 in PBS with 0.001% hydrogen peroxide.  
14 Slides were washed twice with PBS and Nuclei were stained with Hoechst 33342 (Life  
15 Technologies). Imaging of labeled samples was performed using an Olympus FLV1000S  
16 Spectral Laser Scanning Confocal. Image processing and analysis was performed using  
17 FIJI. Quantification: images from 4 independent samples per time point were taken with  
18 a 20x objective and *ia6/h3* double positive cells, *ia6* single positive cells and *h3* positive  
19 cells were counted using the cell counter feature in FIJI. Counts were normalized to the  
20 number of nuclei for each image. Graphs represent cell counts in percent of nuclei,  
21 averaged over 3 independent samples per time point. Between 2500 and 3000 cells  
22 (Hoechst-positive nuclei) were counted for each time point.

23

#### 24 Tracking of EdU labeled cells

25 For every 10 zooids, 2µl of 1mM EdU (Thermo Fisher) dissolved in filtered seawater was  
26 injected into the blood stream of healthy colonies. After 24 hours, Integrin-alpha-6-

1 positive cells were isolated from EdU-injected colonies by flow cytometry and injected  
2 into recipient vessel fragments 24 hours after Mitomycin treatment (see above). The  
3 experiment was performed two times. At stage 3 (n=10) and stage 4 (n=10) of  
4 regeneration, injected samples were fixed and cryosections were prepared as described  
5 above. Sections were fixed with 4% PFA for 30 minutes and treated with proteinase K  
6 for 7 minutes. Sections were post-fixed with 4%PFA for 20 minutes and blocked with  
7 PBS/1% Triton and 3% BSA for 1h. The clickit-reaction cocktail was prepared according  
8 to the manufacturer's instructions and the reaction was stopped after 1h at room  
9 temperature. Nuclei were stained with Hoechst 33342. Regenerating samples injected  
10 with EdU were used as positive control, and uninjected regenerating samples were used  
11 as negative controls. Imaging of labeled samples was performed using an Olympus  
12 FLV1000S Spectral Laser Scanning Confocal.

13

#### 14 Small Molecule Inhibitor Treatment

15 Vessel fragments were cut and placed in the bottom of 24 well plates. 1ml of filtered  
16 seawater containing the Notch-signaling inhibitor DAPT (Tocris, 0.2-2 $\mu$ M), the Wnt-  
17 signaling inhibitor endo-IWR1 (Tocris, 0.1-1 $\mu$ M) or control drugs Exo-IWR (1 $\mu$ M) and the  
18 Notch-sparing gamma-secretase modulator E2012 (1 $\mu$ M) were added to filtered  
19 seawater and replaced every other day. The number of colonies that reached stage 4  
20 were counted at 14 days post injury (n=16 for each condition).

21

#### 22 Pou-Phylogenetic analysis

23 Protein sequences used for phylogenetic analysis were downloaded from the NCBI  
24 database or determined in this study. POU protein sequences were aligned using the  
25 ClustalW algorithm in the MEGA7 application (Kumar et al., 2016). Phylogenetic analysis  
26 of POU family members was performed with the software RAxML using a maximum

1 likelihood method, the JTT substitution matrix, and empirical frequencies (Stamatakis,  
2 2014). RAxML software was accessed using the CIPRES Science Gateway (Creating  
3 the CIPRES science gateway for inference of large phylogenetic trees. In: Proceedings  
4 of the gateway computing environments workshop (GCE), New Orleans, LA, USA; 2010.  
5 p. 1–8.) and trees were visualized using the Interactive Tree of Life website (Letunic I  
6 and Bork P (2006) *Bioinformatics* 23(1):127-8 Interactive Tree Of Life (iTOL): an online  
7 tool for phylogenetic tree display and annotation).

8

9

#### 10 **Competing interests:**

11 The authors state no competing financial interests.

12

#### 13 **Acknowledgements:**

14 The authors would like to thank Bill Smith for providing facilities to grow *Botrylloides*  
15 colonies. We also thank Ben Lopez and the NRI-MCDB microscopy facility at UCSB.  
16 Shane Nourizadeh, Jessa Alcaide and Phillip Ahn are acknowledged for help with  
17 cloning. Delany Rodriguez and William Jeffery are acknowledged for helpful discussions  
18 and critical input. We would like to thank the reviewers from a previous submission for  
19 their constructive criticism and helpful input, which have greatly improved this  
20 manuscript.

21

#### 22 **References:**

23

24 Arakura, N., Hayama, M., Honda, T., Matsuzawa, K., Akamatsu, T., and Ota, H. (2001).  
25 Histone H3 mRNA in situ hybridization for identifying proliferating cells in human  
26 pancreas, with special reference to the ductal system. *Histochem J* 33, 183-191.



- 1 Berrill, N.J. (1947). The developmental cycle of Botrylloides. *Q J Microsc Sci* *88*, 393-  
2 407.
- 3 Blanchoud, S., Zondag, L., Lamare, M.D., and Wilson, M.J. (2017). Hematological  
4 Analysis of the Ascidian Botrylloides leachii (Savigny, 1816) During Whole-Body  
5 Regeneration. *Biol Bull* *232*, 143-157.
- 6 Brown, F.D., Keeling, E.L., Le, A.D., and Swalla, B.J. (2009a). Whole body regeneration  
7 in a colonial ascidian, Botrylloides violaceus. *J Exp Zool B Mol Dev Evol* *312*, 885-  
8 900.
- 9 Brown, F.D., and Swalla, B.J. (2007). Vasa expression in a colonial ascidian,  
10 Botrylloides violaceus. *Evol Dev* *9*, 165-177.
- 11 Brown, F.D., and Swalla, B.J. (2012). Evolution and development of budding by stem  
12 cells: ascidian coloniality as a case study. *Dev Biol* *369*, 151-162.
- 13 Brown, F.D., Tiozzo, S., Roux, M.M., Ishizuka, K., Swalla, B.J., and De Tomaso, A.W.  
14 (2009b). Early lineage specification of long-lived germline precursors in the colonial  
15 ascidian Botryllus schlosseri. *Development* *136*, 3485-3494.
- 16 Carpenter, M.A., Powell, J.H., Ishizuka, K.J., Palmeri, K.J., Rendulic, S., and De Tomaso,  
17 A.W. Growth and long-term somatic and germline chimerism following fusion of  
18 juvenile Botryllus schlosseri. *Biol Bull* *220*, 57-70.
- 19 Carpenter, M.A., Powell, J.H., Ishizuka, K.J., Palmeri, K.J., Rendulic, S., and De Tomaso,  
20 A.W. (2011). Growth and long-term somatic and germline chimerism following  
21 fusion of juvenile Botryllus schlosseri. *Biol Bull* *220*, 57-70.
- 22 Gold, D.A., Gates, R.D., and Jacobs, D.K. (2014). The early expansion and evolutionary  
23 dynamics of POU class genes. *Mol Biol Evol* *31*, 3136-3147.
- 24 Gown, A.M., Jiang, J.J., Matles, H., Skelly, M., Goodpaster, T., Cass, L., Reshatof, M.,  
25 Spaulding, D., and Coltrera, M.D. (1996). Validation of the S-phase specificity of  
26 histone (H3) in situ hybridization in normal and malignant cells. *J Histochem*  
27 *Cytochem* *44*, 221-226.
- 28 Grotek, B., Wehner, D., and Weidinger, G. (2013). Notch signaling coordinates  
29 cellular proliferation with differentiation during zebrafish fin regeneration.  
30 *Development* *140*, 1412-1423.
- 31 Hamada, M., Goricki, S., Byerly, M.S., Satoh, N., and Jeffery, W.R. (2015). Evolution of  
32 the chordate regeneration blastema: Differential gene expression and conserved  
33 role of notch signaling during siphon regeneration in the ascidian Ciona. *Dev Biol*  
34 *405*, 304-315.
- 35 Hu, Y., and Smyth, G.K. (2009). ELDA: extreme limiting dilution analysis for  
36 comparing depleted and enriched populations in stem cell and other assays. *J*  
37 *Immunol Methods* *347*, 70-78.
- 38 J., B.N. (1951). REGENERATION AND BUDDING IN TUNICATES. *Biological Reviews*  
39 *26*, 456-475.
- 40 Juliano, C., Wang, J., and Lin, H. (2011). Uniting germline and stem cells: the function  
41 of Piwi proteins and the piRNA pathway in diverse organisms. *Annu Rev Genet* *45*,  
42 447-469.
- 43 Juliano, C.E., Reich, A., Liu, N., Gotzfried, J., Zhong, M., Uman, S., Reenan, R.A., Wessel,  
44 G.M., Steele, R.E., and Lin, H. (2014). PIWI proteins and PIWI-interacting RNAs  
45 function in Hydra somatic stem cells. *Proc Natl Acad Sci U S A* *111*, 337-342.

- 1 Juliano, C.E., Swartz, S.Z., and Wessel, G.M. (2010). A conserved germline  
2 multipotency program. *Development* 137, 4113-4126.
- 3 Kassmer, S.H., Nourizadeh, S., and De Tomaso, A.W. (2018). Cellular and molecular  
4 mechanisms of regeneration in colonial and solitary Ascidians. *Dev Biol*.
- 5 Kassmer SH, R.D., Langenbacher AD, Bui C, De Tomaso AW (2015). Migration of  
6 germline progenitor cells is directed by sphingosine-1-phosphate signalling in a  
7 basal chordate. *Nature Communications* 6.
- 8 Kassmer, S.H., Rodriguez, D., Langenbacher, A.D., Bui, C., and De Tomaso, A.W.  
9 (2015). Migration of germline progenitor cells is directed by sphingosine-1-  
10 phosphate signalling in a basal chordate. *Nat Commun* 6, 8565.
- 11 Kawakami, Y., Rodriguez Esteban, C., Raya, M., Kawakami, H., Marti, M., Dubova, I.,  
12 and Izpisua Belmonte, J.C. (2006). Wnt/beta-catenin signaling regulates vertebrate  
13 limb regeneration. *Genes Dev* 20, 3232-3237.
- 14 Kawamura, K., and Sunanaga, T. Hemoblasts in colonial tunicates: are they stem cells  
15 or tissue-restricted progenitor cells? *Dev Growth Differ* 52, 69-76.
- 16 Kawamura, K., and Sunanaga, T. (2011). Role of Vasa, Piwi, and Myc-expressing  
17 coelomic cells in gonad regeneration of the colonial tunicate, *Botryllus primigenus*.  
18 *Mech Dev* 128, 457-470.
- 19 Krebsbach, P.H., and Villa-Diaz, L.G. (2017). The Role of Integrin alpha6 (CD49f) in  
20 Stem Cells: More than a Conserved Biomarker. *Stem Cells Dev* 26, 1090-1099.
- 21 Kumar, S., Stecher, G., and Tamura, K. (2016). MEGA7: Molecular Evolutionary  
22 Genetics Analysis Version 7.0 for Bigger Datasets. *Mol Biol Evol* 33, 1870-1874.
- 23 Laird, D.J., De Tomaso, A.W., and Weissman, I.L. (2005). Stem cells are units of  
24 natural selection in a colonial ascidian. *Cell* 123, 1351-1360.
- 25 Langenbacher, A.D., and De Tomaso, A.W. (2016). Temporally and spatially dynamic  
26 germ cell niches in *Botryllus schlosseri* revealed by expression of a TGF-beta family  
27 ligand and vasa. *Evodevo* 7, 9.
- 28 Langenbacher, A.D., Rodriguez, D., Di Maio, A., and De Tomaso, A.W. Whole-mount  
29 fluorescent in situ hybridization staining of the colonial tunicate *Botryllus*  
30 *schlosseri*. *Genesis*.
- 31 Langenbacher, A.D., Rodriguez, D., Di Maio, A., and De Tomaso, A.W. (2015). Whole-  
32 mount fluorescent in situ hybridization staining of the colonial tunicate *Botryllus*  
33 *schlosseri*. *Genesis* 53, 194-201.
- 34 Li, Q., Yang, H., and Zhong, T.P. (2015). Regeneration across metazoan phylogeny:  
35 lessons from model organisms. *J Genet Genomics* 42, 57-70.
- 36 Meshi, T., Taoka, K.I., and Iwabuchi, M. (2000). Regulation of histone gene  
37 expression during the cell cycle. *Plant Mol Biol* 43, 643-657.
- 38 Millane, R.C., Kanska, J., Duffy, D.J., Seoighe, C., Cunningham, S., Plickert, G., and  
39 Frank, U. (2011). Induced stem cell neoplasia in a cnidarian by ectopic expression of  
40 a POU domain transcription factor. *Development* 138, 2429-2439.
- 41 Oka, H.W.H. (1959). VASCULAR BUDDING IN BOTRYLLOIDES. *The Biological*  
42 *Bulletin* 117, 340-346.
- 43 Osley, M.A. (1991). The regulation of histone synthesis in the cell cycle. *Annu Rev*  
44 *Biochem* 60, 827-861.
- 45 Perdigoto, C.N., and Bardin, A.J. (2013). Sending the right signal: Notch and stem  
46 cells. *Biochim Biophys Acta* 1830, 2307-2322.

- 1 Reddien, P.W. (2018). The Cellular and Molecular Basis for Planarian Regeneration.  
2 *Cell* 175, 327-345.
- 3 Reddien, P.W., and Sanchez Alvarado, A. (2004). Fundamentals of planarian  
4 regeneration. *Annu Rev Cell Dev Biol* 20, 725-757.
- 5 Reya, T., and Clevers, H. (2005). Wnt signalling in stem cells and cancer. *Nature* 434,  
6 843-850.
- 7 Rinkevich, Y., Rosner, A., Rabinowitz, C., Lapidot, Z., Moiseeva, E., and Rinkevich, B.  
8 (2010). Piwi positive cells that line the vasculature epithelium, underlie whole body  
9 regeneration in a basal chordate. *Dev Biol* 345, 94-104.
- 10 Rodriguez, D., Kassmer, S.H., and De Tomaso, A.W. (2016). Gonad Development and  
11 Hermaphroditism in the Ascidian *Botryllus schlosseri*. *Mol Reprod Dev in press*.
- 12 Sanchez Alvarado, A. (2004). Regeneration and the need for simpler model  
13 organisms. *Philos Trans R Soc Lond B Biol Sci* 359, 759-763.
- 14 Sanchez Alvarado, A., and Tsonis, P.A. (2006). Bridging the regeneration gap: genetic  
15 insights from diverse animal models. *Nat Rev Genet* 7, 873-884.
- 16 Sanchez Alvarado, A., and Yamanaka, S. Rethinking differentiation: stem cells,  
17 regeneration, and plasticity. *Cell* 157, 110-119.
- 18 Seto, A.G., Kingston, R.E., and Lau, N.C. (2007). The coming of age for Piwi proteins.  
19 *Mol Cell* 26, 603-609.
- 20 Shi, G., and Jin, Y. (2010). Role of Oct4 in maintaining and regaining stem cell  
21 pluripotency. *Stem Cell Res Ther* 1, 39.
- 22 Solana, J. (2013). Closing the circle of germline and stem cells: the Primordial Stem  
23 Cell hypothesis. *Evodevo* 4, 2.
- 24 Stamatakis, A. (2014). RAxML version 8: a tool for phylogenetic analysis and post-  
25 analysis of large phylogenies. *Bioinformatics* 30, 1312-1313.
- 26 Sunanaga, T., Inubushi, H., and Kawamura, K. (2010). Piwi-expressing hemoblasts  
27 serve as germline stem cells during postembryonic germ cell specification in  
28 colonial ascidian, *Botryllus primigenus*. *Dev Growth Differ* 52, 603-614.
- 29 Sunanaga, T., Saito, Y., and Kawamura, K. (2006). Postembryonic epigenesis of Vasa-  
30 positive germ cells from aggregated hemoblasts in the colonial ascidian, *Botryllus*  
31 *primigenus*. *Dev Growth Differ* 48, 87-100.
- 32 Sunanaga, T., Watanabe, A., and Kawamura, K. (2007). Involvement of vasa homolog  
33 in germline recruitment from coelomic stem cells in budding tunicates. *Dev Genes*  
34 *Evol* 217, 1-11.
- 35 Tal, T.L., Franzosa, J.A., and Tanguay, R.L. (2010). Molecular signaling networks that  
36 choreograph epimorphic fin regeneration in zebrafish - a mini-review. *Gerontology*  
37 56, 231-240.
- 38 Vogg, M.C., Wenger, Y., and Galliot, B. (2016). How Somatic Adult Tissues Develop  
39 Organizer Activity. *Curr Top Dev Biol* 116, 391-414.
- 40 Voronina, E., Lopez, M., Juliano, C.E., Gustafson, E., Song, J.L., Extavour, C., George, S.,  
41 Oliveri, P., McClay, D., and Wessel, G. (2008). Vasa protein expression is restricted to  
42 the small micromeres of the sea urchin, but is inducible in other lineages early in  
43 development. *Dev Biol* 314, 276-286.
- 44 Wagner, D.E., Wang, I.E., and Reddien, P.W. (2011). Clonogenic neoblasts are  
45 pluripotent adult stem cells that underlie planarian regeneration. *Science* 332, 811-  
46 816.

- 1 Wehner, D., Cizelsky, W., Vasudevaro, M.D., Ozhan, G., Haase, C., Kagermeier-Schenk,  
 2 B., Roder, A., Dorsky, R.I., Moro, E., Argenton, F., *et al.* (2014). Wnt/beta-catenin  
 3 signaling defines organizing centers that orchestrate growth and differentiation of  
 4 the regenerating zebrafish caudal fin. *Cell Rep* 6, 467-481.  
 5 Yajima, M., and Wessel, G.M. (2011). Small micromeres contribute to the germline in  
 6 the sea urchin. *Development* 138, 237-243.  
 7 Zondag, L.E., Rutherford, K., Gemmell, N.J., and Wilson, M.J. (2016). Uncovering the  
 8 pathways underlying whole body regeneration in a chordate model, *Botrylloides*  
 9 *leachi* using de novo transcriptome analysis. *BMC Genomics* 17, 114.  
 10  
 11  
 12

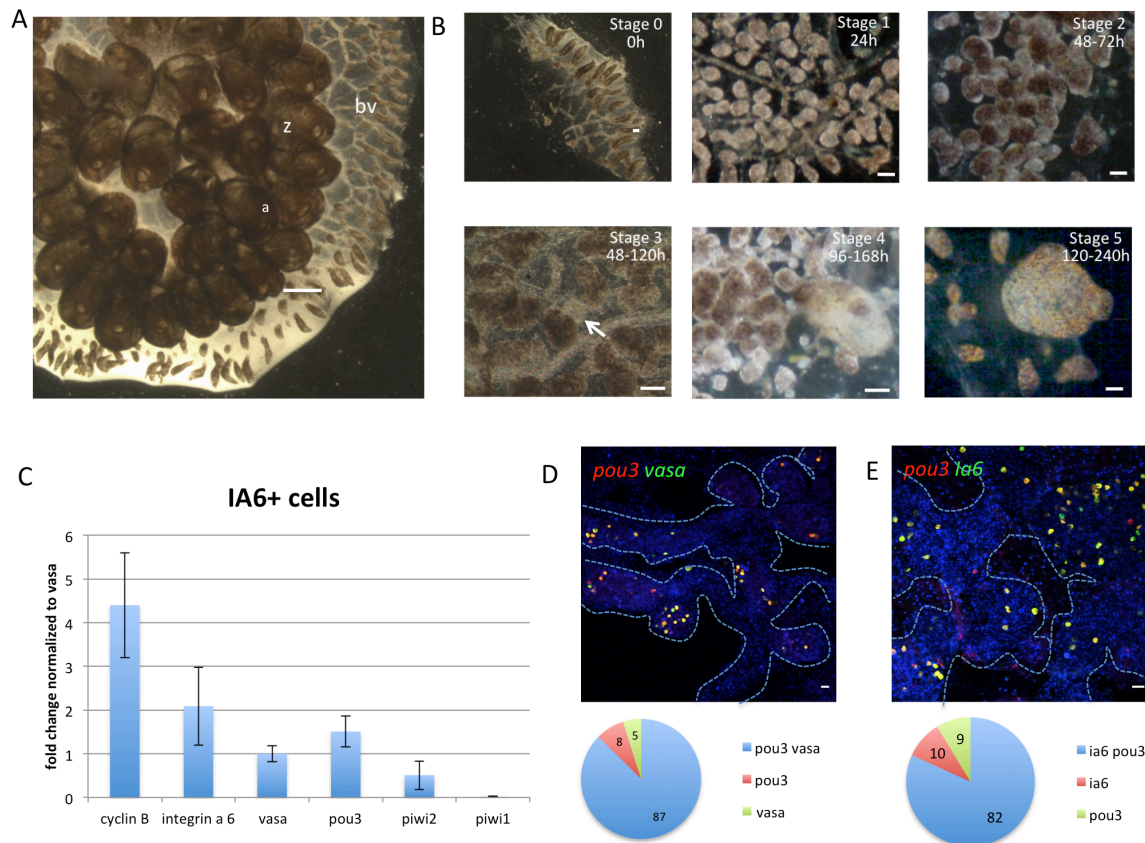

13

**Figure 1: Stages of whole body regeneration, gene expression in IA6+ cells.** A) *Botrylloides diegensis*, whole colony brightfield image, dorsal. Zooids (z) are embedded in a common, transparent tunic. Blood vessels (bv) extend throughout the tunic and are shared by the zooids of the colony. At the periphery of the colony, blood vessels form terminal sacs termed “ampullae” (a). Scale bar 1mm. B) Stage of whole body regeneration, brightfield images. Blood vessels are surgically separated from the colony (stage 0). During the first 24h, the blood vessel begins to remodel (stage 1). After 48h, blood vessels become condensed and highly pigmented (stage 2). Regeneration begins when a double vesicle is formed, consisting of two layers of epithelium (stage 3, white arrow). This double vesicle undergoes organogenesis (stage 4) and gives rise

to a new, filter feeding body (stage 5). Scale bars 200µm. C) qPCR analysis showing expression of *cyclin B*, *integrin-alpha-6*, *vasa*, *pou3*, *piwi2* and *piwi1* in IA6+ cells isolated by flow cytometry. Data are expressed as averages of fold changes normalized to *vasa*, n=4. Error bars show standard deviation. D) FISH showing co-expression of *pou3* (red) and *vasa* (green) in stage 0. DNA was stained with Hoechst (blue). Blue dashed lines outline blood vessel boundaries. Scale bar 20µm. Single positive and double positive cells were counted using the cell counter feature in FIJI, and for each stage, 4 images from 4 independent samples were counted. Pie graph shows averages of percentages of *pou3/vasa*-double-positive cells as well as *pou3* and *vasa* single positive cells. E) FISH showing co-expression of *pou3* (red) and *ia6* (green) in stage 0. DNA was stained with Hoechst (blue). Blue dashed lines outline blood vessel boundaries. Scale bar 20µm. Single positive and double positive cells were counted using the cell counter feature in FIJI, and for each stage, 4 images from 4 independent samples were counted. Pie graph shows averages of percentages of *pou3/ia6*-double-positive cells as well as *pou3* and *ia6* single positive cells.



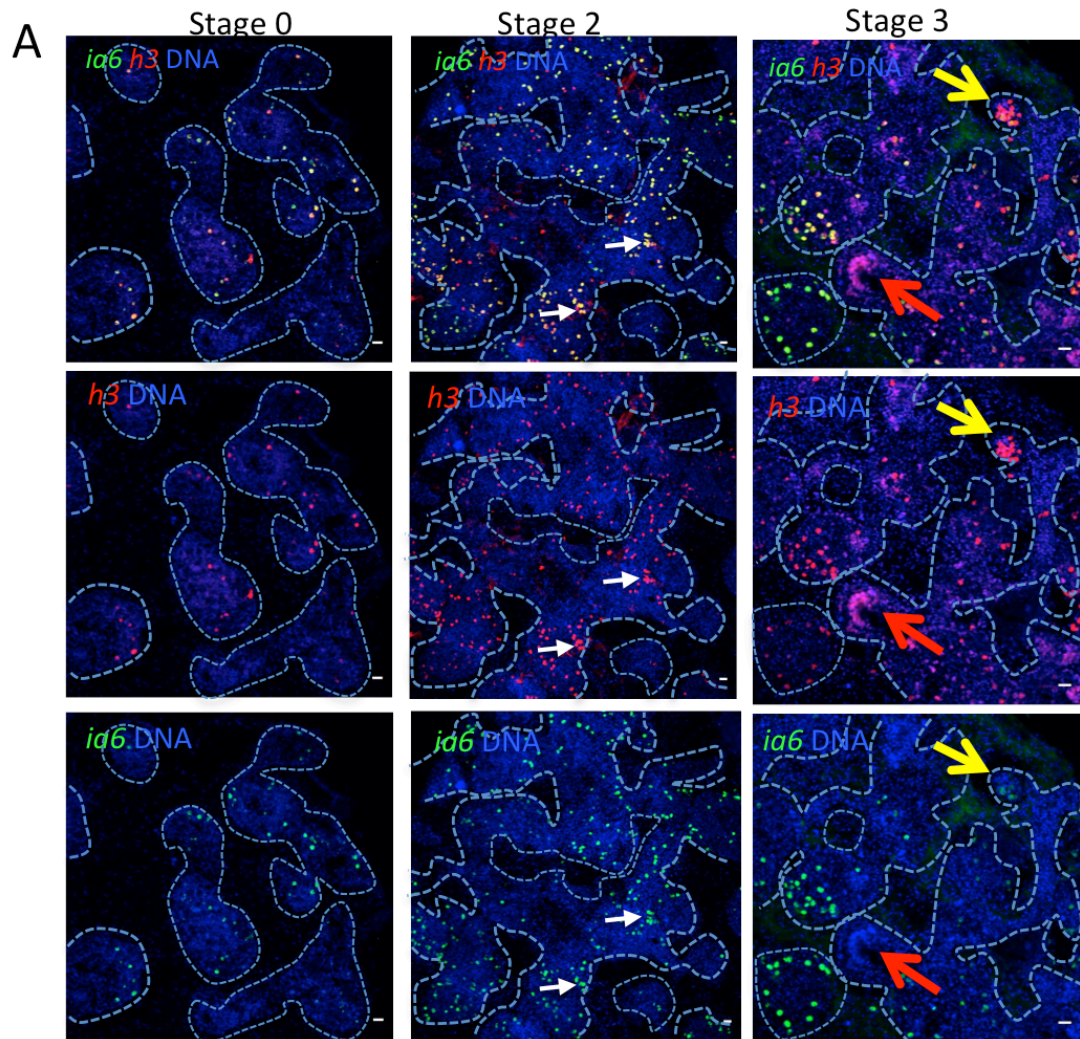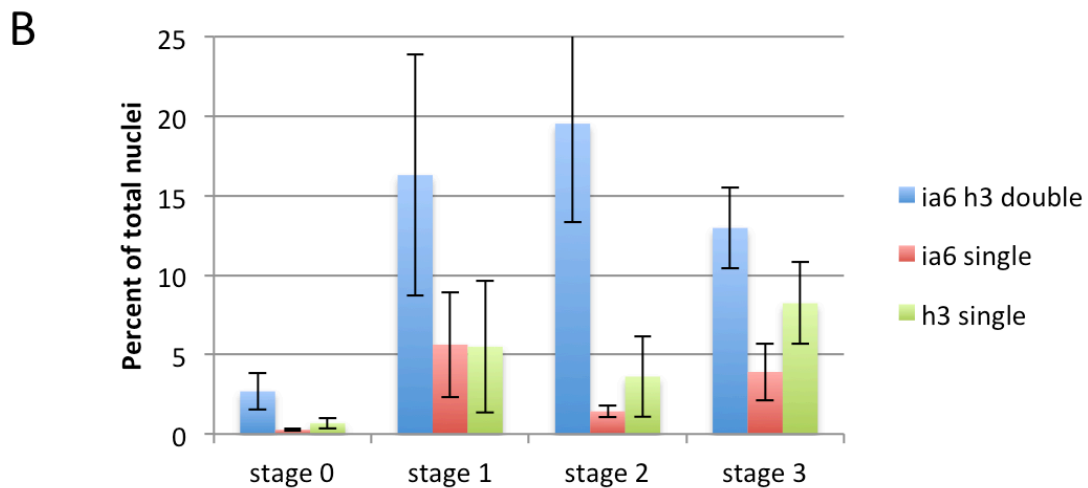

Figure 2: **Whole body regeneration is associated with proliferation of blood borne *integrin-alpha-6+* cells.** A: Fluorescent in situ hybridization (FISH) showing expression of *integrin-alpha-6* (*ia6*, green) and *histone 3* (*h3*, red) during stages 0, 2 and 3 of WBR. White arrows indicate *ia6+* cells beginning to cluster during Stage 2. Yellow and red arrows in Stage 3 show different stages of WBR. As clusters increase in

size, they begin to lose *ia6* expression (yellow arrows). As cell clusters differentiate to form the blastula-like structure, *ia6* expression is not detected (red arrows). DNA was stained with Hoechst (blue) in all panels. Blue dashed lines outline blood vessel boundaries. Scale bars 20 $\mu$ m. B) Single positive (*ia6* or *h3*) and double positive cells were counted using the cell counter feature in FIJI, and for each stage, 4 images from 4 independent samples were counted. Graph shows percentages of *ia6/h3* double positive and *ia6*- or *h3*-single positive cells among all Hoechst-positive nuclei. Error bars show standard deviation.

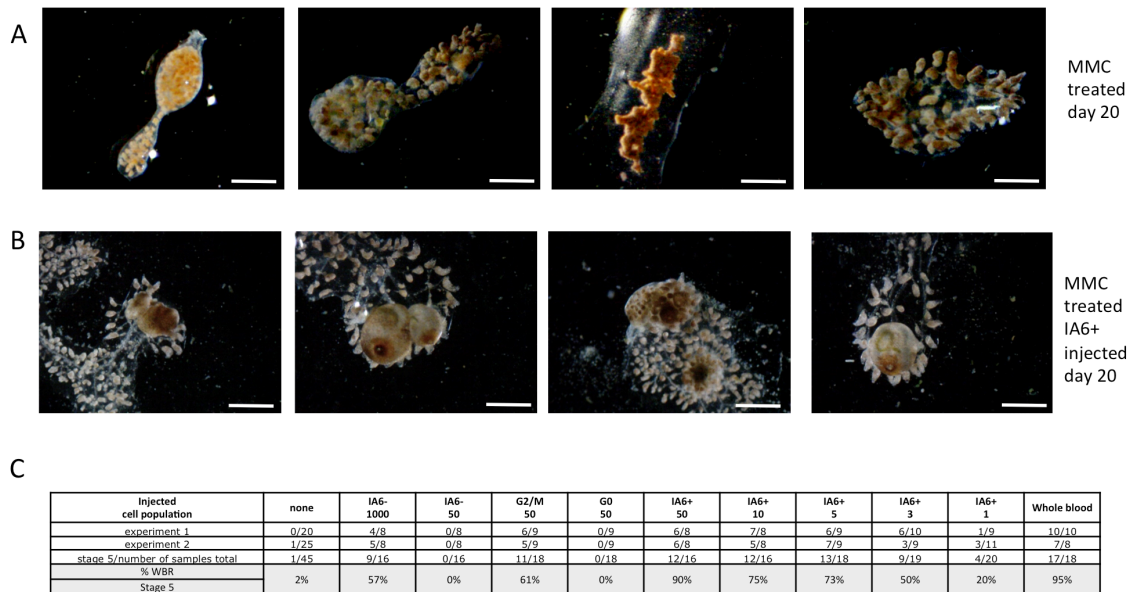

Figure 3: **IA6+ cells are required for whole body regeneration.** A: Mitomycin C (MMC) treatment prevents regeneration. Brightfield images of vessel fragments 20 days post MMC treatment. Vessel fragments were treated with MMC for 16h immediately after surgery. After 16h, MMC was removed, and the samples followed for 20 days. Scale Bar 1mm B: Injection of IA6+ cells 24h after MMC treatment rescues WBR. Brightfield images of MMC treated vessel fragments 20 days post injection of IA6+ cells. Scale Bar 1mm C: Table showing rates (percentages) of WBR (reaching stage 5) 20 days after injection of different cell populations. For each condition, 16-20 samples were injected in two independent experiments.

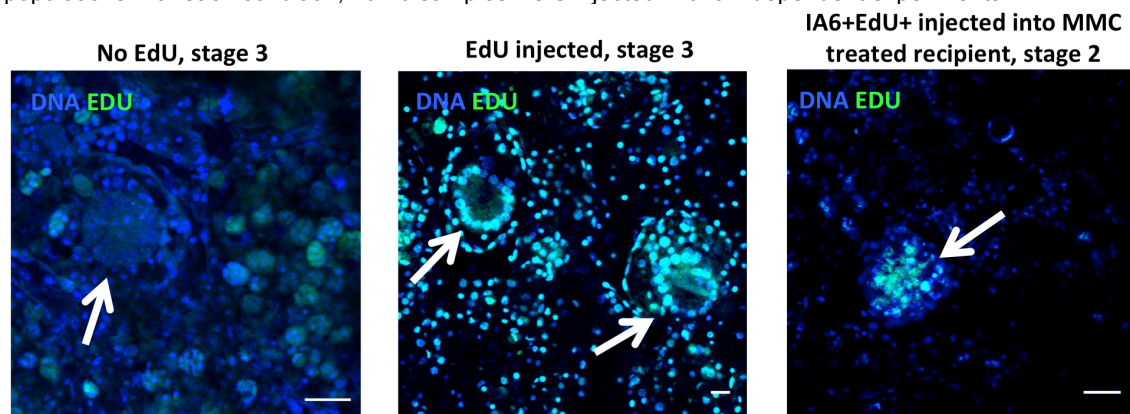

Figure 4: IA6+ cells give rise to regenerating tissues.

Overlay of nuclear staining (Hoechst, blue) and Edu (green). Left: In vessel sections from stage 3 samples not injected with EdU, no green EdU signal is detected. Middle: In stage 3 samples that have been injected with EdU at stage 0, EdU-positive cells are present in the blood as well as in regenerating double vesicles (white arrows). Right: IA6+ cells were isolated from Edu-treated animals and injected into MMC treated vessel fragments. Edu-positive cells give rise to regeneration foci at late stage 2 (white arrows). Scale bars 20µm. Images are representative of 10 samples from two independent experiments.

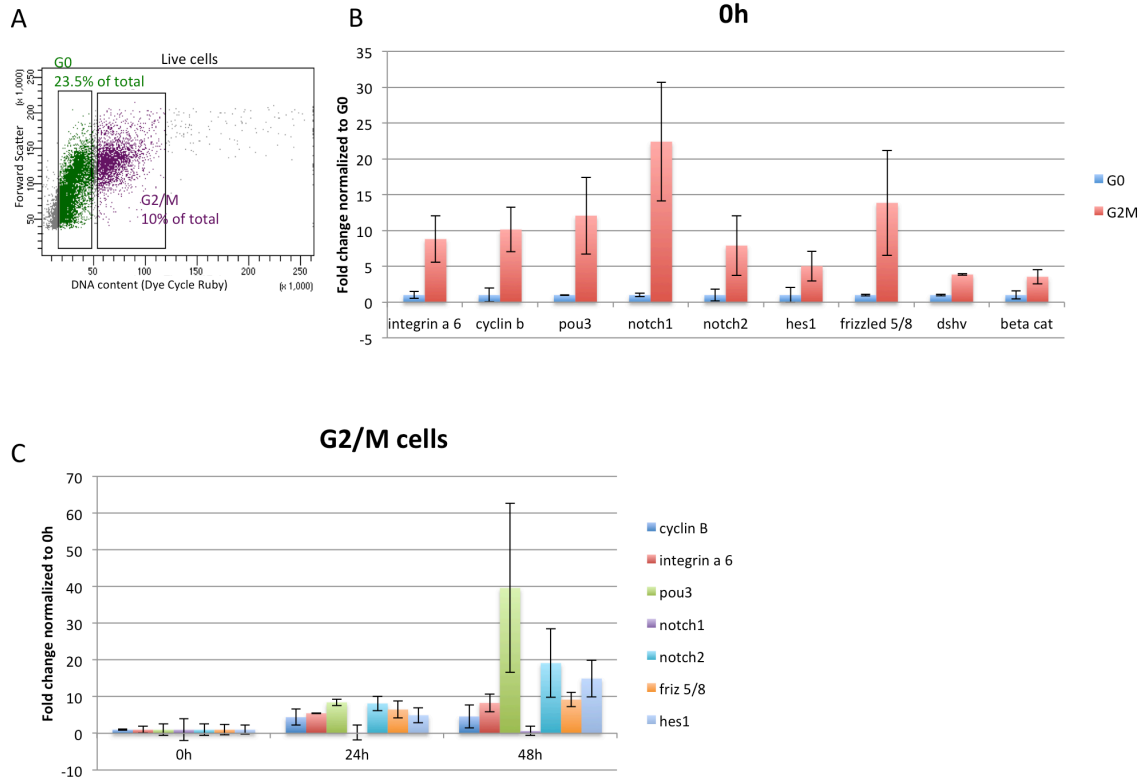

**Figure 5: Gene expression in cycling blood borne cells in steady state and during WBR.** A) Isolation of cycling G2/M cells by flow cytometry. Cells were stained with the live DNA stain Dye Cycle Ruby. Linear analysis of fluorescence intensity plotted against forward scatter (cell size) shows a clear separation of G2/M cells with 4n DNA content and G0/G1 cells with 2n DNA content. G2/M cells comprise 10% of live cells. B) qPCR analysis showing expression of, *integrin-alpha-6*, *cyclin b*, *pou3*, *notch1*, *notch2*, *hes1*, *frizzled 5/8*, *disheveled (dshv)* and *beta catenin* in G2/M cells in steady state (0h). Data are expressed as averages of fold changes normalized to G0 cells, n=3. C) qPCR analysis showing expression of *cyclin b*, *integrin-alpha-6*, *pou3*, *notch1*, *notch2*, and *frizzled 5/8* in G2/M cells at 24h and 48h post-injury, Data are expressed as averages of fold changes normalized to 0h (stage 0), n=4. Error bars represent standard deviation.



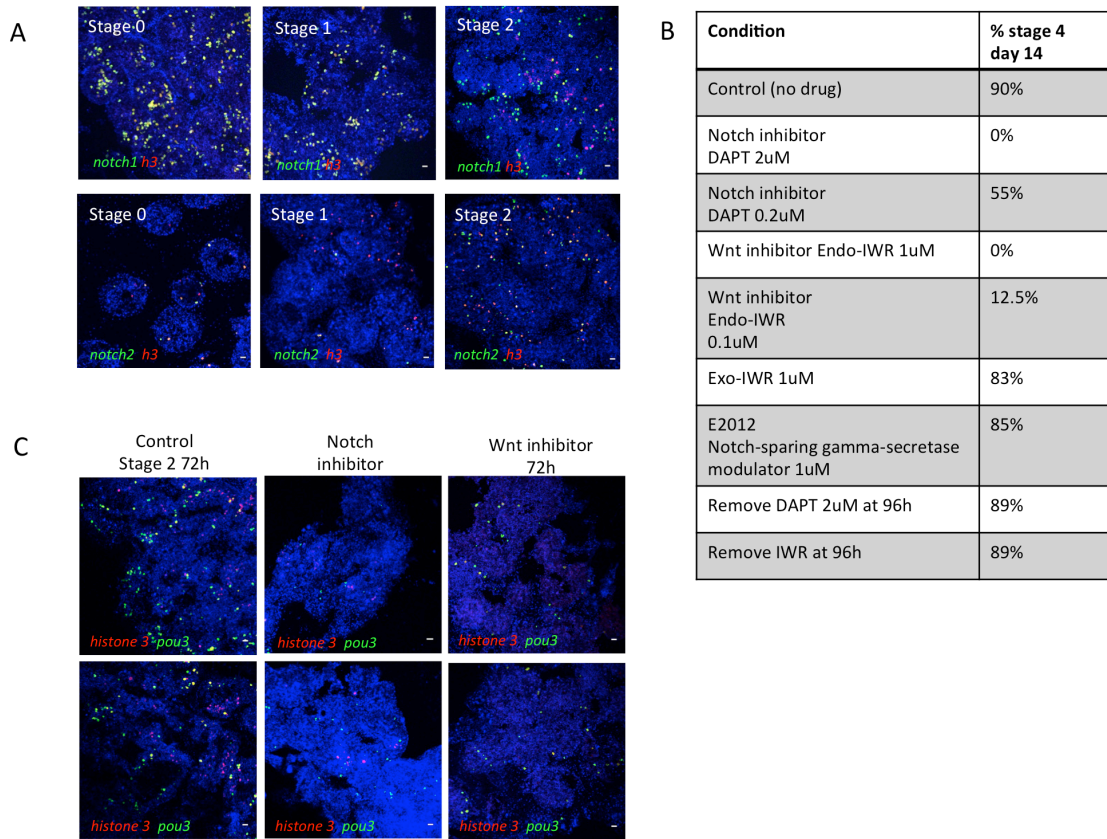

**Figure 6: Inhibition of Notch or Wnt signaling prevents WBR and blocks proliferation of pou3+ cells.**

A: top panel: FISH for *notch1* (green) and *h3* (red) during steady state (stage 0) and during early stages of WBR. Bottom panel: FISH for *notch2* (green) and *h3* (red) during steady state (stage 0) and during early stages of WBR. Scale bar 20µm B: table showing the percentages of vessel fragments reaching stage 4 at day 14 post injury during treatment with different doses of inhibitors of canonical wnt signaling (Endo-IWR), Notch signaling (DAPT) or control drugs Exo-IWR (1µM) and the Notch-sparing gamma-secretase modulator E2012 (1µM). The number of colonies that reached stage 4 were counted at 14 days post injury. Percentages represent the number of fragments reaching stage 4, with n= 14-18 fragments for each condition. Controls received vehicle only. C) FISH for *pou3* (green) and *h3* (red) showing a reduction in proliferating *pou3*+ cells 72h after surgery when treated with an inhibitor of either Notch or Wnt signaling. Scale bars 20µm.
