# Supplementary material for: Integrin-alpha-6+ Stem Cells (ISCs) are responsible for whole body regeneration in an invertebrate chordate
Source: bioRxiv or medRxiv preprint supplement (doi:10.1101/647578), 2019-12-12
Supplement: Supplementary file [file media-1.pdf]

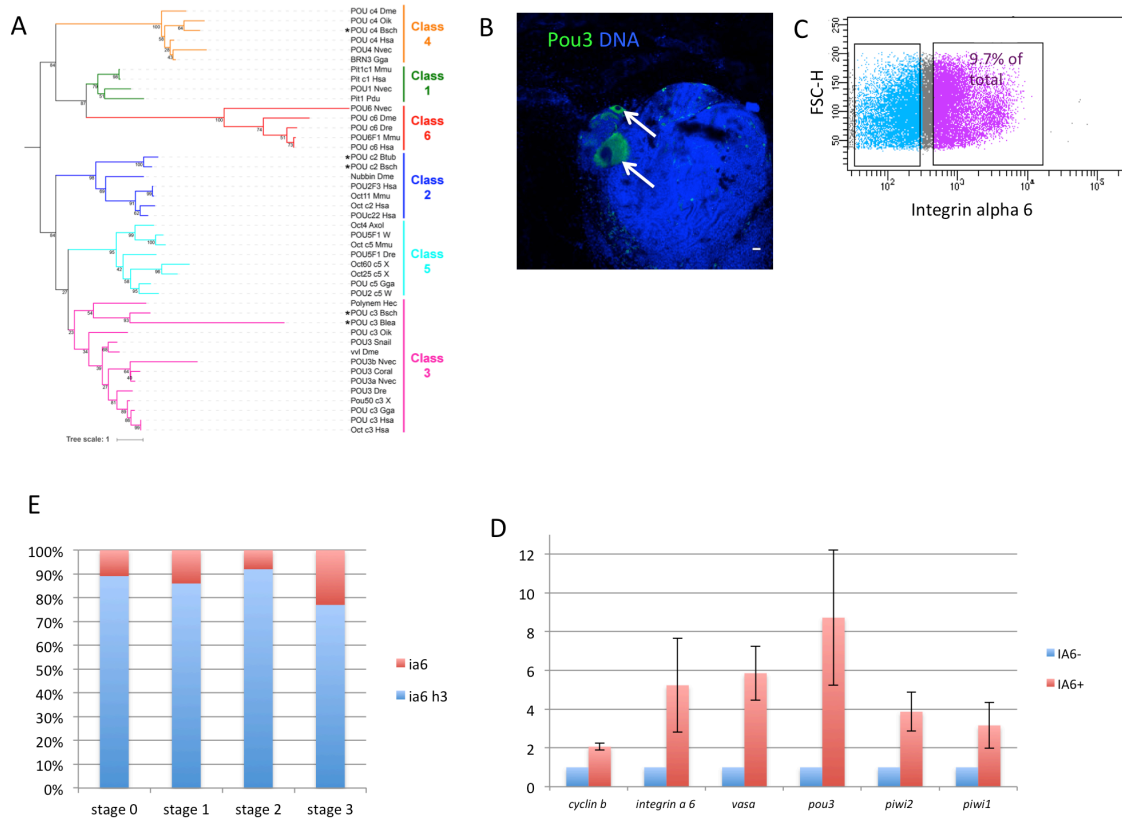

**Figure S1:** A: Maximum likelihood phylogenetic analysis of POU family members. Phylogenetic tree was constructed with RAxML using a maximum likelihood method, the JTT substitution matrix, and empirical frequencies. Botryllid POU proteins identified in this study are marked by asterisks. Families of POU proteins are labeled and indicated by vertical lines. Nodes are labeled with bootstrap values in units of percentage. The scale bar for branch lengths indicates the mean number of inferred substitutions per site. B: FISH for *pou3* (green) on whole colonies. *Pou3* is expressed in germ cells associated with the secondary bud (arrows). C: Fluorescence-activated cell sorting (FACS) of Integrin-alpha-6-positive cells. Integrin-alpha-6-negative cells were gated based on isotype-control staining. D: quantitative-real-time-PCR analysis of gene expression in FACS-sorted IA6+ cells. Data are expressed as averages from 4 experiments, normalized to IA6- cells. E: Percentages of ia6/h3 double positive cells (blue) and ia6 single positive cells (red) for each stage. Single positive (*ia6* or *h3*) and double positive cells were counted using the cell counter feature in FIJI, and for each stage, 4 images from 4 independent samples were counted.

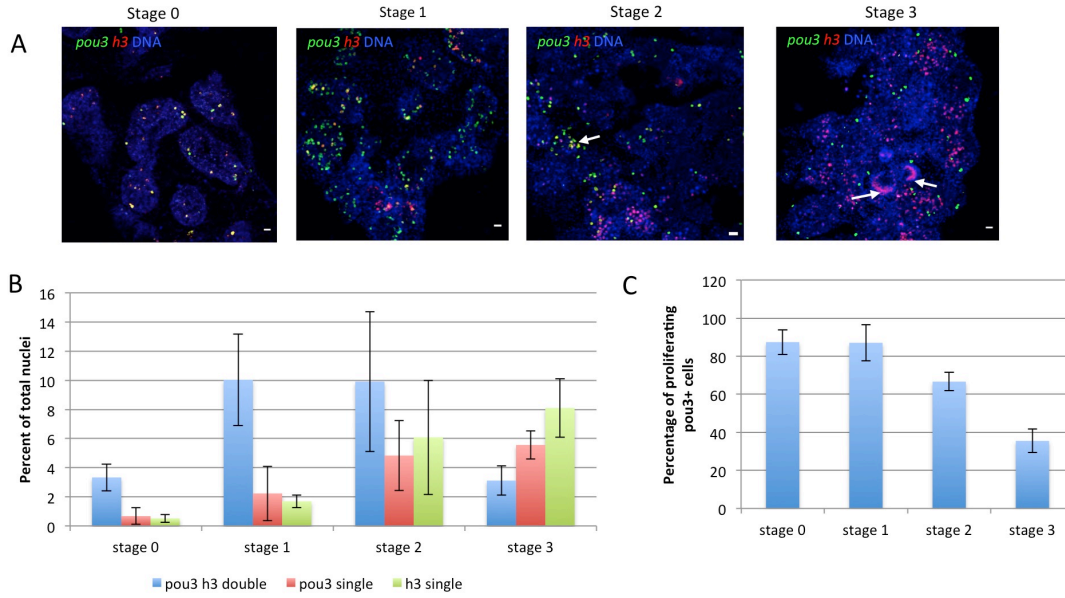

**Figure S2:**A) FISH showing expression of *pou3* (green) and *histone 3* (h3, red) during stages 0, 1, 2 and 3 of WBR. DNA was stained with Hoechst (blue). Scale bars 20um. Arrows in stage 3 indicate the beginning of double vesicle formation. B) Single positive (*pou3* or h3) and double positive cells were counted using the cell counter feature in FIJI, and for each stage, 4 images from 4 independent samples were counted, comprising a total of 2500 - 3000 cells for each sample. Graph shows percentages of *pou3*/*h3* double positive and *pou3*- or *h3*- single positive cells among all Hoechst-positive nuclei. Error bars show standard deviation. C) Averages of percentages of proliferating *pou3*+ cells among all *pou3*+ cells. Double positive cells were counted using the cell counter feature in FIJI, and for each stage, 4 images from 4 independent samples were counted, comprising a total of 2500 - 3000 cells for each sample. Error bars represent standard deviation.

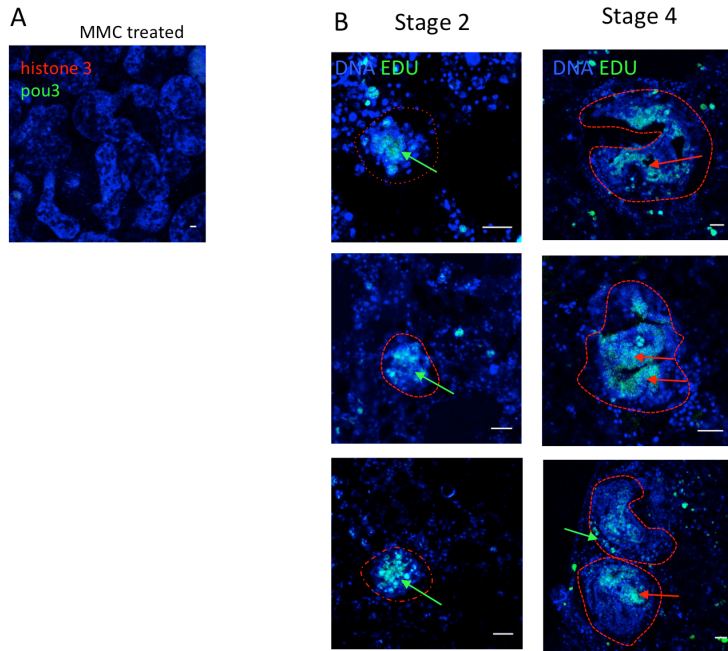

**Figure S3:** A: FISH for pou3 and histone 3 5 days after treatment with Mitomycin C. Scale bar 20 $\mu$ m. B: IA6+ cells were isolated from Edu-treated animals and injected into MMC treated vessel fragments. Overlay of nuclear staining (Hoechst, blue) and Edu (green) shows Edu-positive cells giving rise to regeneration foci at late stage 2 (white arrows). Red dotted lines outline regeneration foci. Scale bars 20 $\mu$ m. Images are representative of 10 samples from two independent experiments. Several samples from the same experiment as in A were followed to stage 4 (organogenesis). Red arrows: Edu-positive cells are present in several layers of differentiating tissue (red arrows) and occasionally in the outer epithelial internal tissue layers. Green arrows: Edu-positive epithelial layer. Red dotted lines outline regeneration niches. Scale bars 20 $\mu$ m.

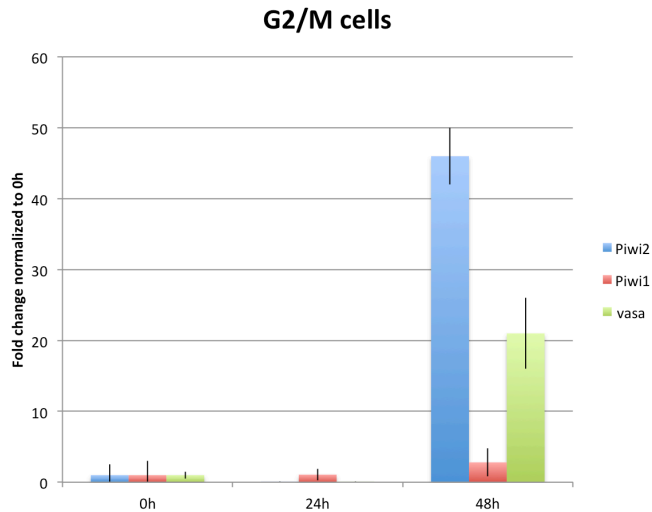

**Figure S4:** Q-PCR analysis of gene expression in cycling G2/M cells at different time points of WBR. Data are expressed as averages of 3 experiments, normalized to 0h. Error bars show standard deviation.

### **Pou3-phylogenetic analysis – protein sequences**

*Botryllus schlosseri* Class 4 POU (POU\_c4\_Bsch):

FESLTLSHNNMVALKPILTTWLELAEEEEYRRKMEQSLAEKRRKRTSIAAPEKRSLEAYFLVQPRPSSEKIAAI  
AEKLDLKKNVVRVWFCNQRQKQKRMKFSAFNGENGGM

*Botryllus schlosseri* Class 2 POU (POU\_c2\_Bsch):

MLQYQQHRMFEDRRHSGGEFIHARPPSPGMHPGISQSPXHQSDYEETSSKRQRYEDEASELESLEFADFDFK  
QRRIKMGFTQGQDVGVAMGRFYGNDFSTTISRFEALNLSVKNMGKLPKLLERWLIDVDRAISTGERSEGRPV  
LSQPMAMNSQSCAGRKRKRRTSIPTEGKSRLEDAFLKNPKPTTEEIGKFSLEDLNDREVVRVWFCNRRQK  
QKRIATQQRYVGEQHSPPAGFNEPHSVEGQRSPISSEDENYGSHHLSRPPVHQAIEHSEMGLPPLPP  
RPGIHLKLSHQMFGFRPPNYSSHSSLMGGNSAI

*Botryllus schlosseri* Class 3 POU (POU\_c3\_Bsch):

VEFYEMLSQVPNGELAYGSPLQDGGCKYSSHSEVGGKCRNKTRIHENPHMPNHSPVMSYSTPGLSTYACLDSDQ  
PPIRSDTSQEQESFTKISDEHYRPYPNGYQFSNHQYQFNQSGYHRALPIPSLQEQLYSVHDSRQRIPRSRSPHTS  
QVTEDFVIKESPAYTNDANVQSWHSFVHSAREISESSRLNTTSNAGCYPPIANSVCASDKAGCVYSYQNPQGQY  
PYCYSRNYYPASTNLQNRWNPIDLSLKQDHCDDYQPTHTFTSYSPLRIDERNLLSDERTLNKLPC  
DDMSLNGWTEEDMRQFSKVFKRRRTKLGTYQSDVGTSLGELYGSVFSQTTICRFEAQQLSLKNMCKLRPLLS  
RWLQHKDNKHETLTPDIDQIDSENGPGRKRKRRTSIEAEVKAVLEKHFKLKPKPMTQEIVSIAEQLSLEKEVV  
RIWFCNRRQKEKKVNEQVMRSQNPT

*Botryllus tuberatus* Class 2 POU (POU\_c2\_Btub):

LQGKEQKQKLDYSQEDDRFAPAPGFHERHFVRQPSDFDVPDPRQIRPDFAIRHSMLSHPVLLDNRRRCSEEN  
MSPGPESPTVTPANMARHIPQSFSSDDQCDYDEIPKRRMYDDEASELEDELEQFAKDFKQKRIKMGFTQGD  
VGVAMGKQFYGNDFSTTISRFEALNLSVKNMCKLKPPLERWLIDVDRAISDRGEGGRLAISQPVIPMHPQQCT  
GRKRKRRTSIPTEGKTRLEDAFKKNPKPTTEEICKFSENKMDREVVRVWF

*Botrylloides leachii* Class 3 POU (POU\_c3\_Blea):

NNFYAHVSLTNENGRSVIAQNECSGKQSPYKEYETPIKELTYMSLHPRTVTSNGYYSQSSTFGENFRHFPT  
QSPYTGHDHNPNGYNSYPPTLIPADCLQGSLSRHSFNSTFAPESYASEQNSDHPRISRSAPPNVTITECSDT  
HYNANSVKCFSDRHSEYSYHPLSPANMGVVCCKREITPSPQLRHEISSWRGQELCPPSYLHQDTPQYRYSY  
QANYWPLSPANSTSCSYQKASSNRFVKQERFQDYQTNTPMQKLPFRNFCTAAERGFNETQFEQKFTSDES  
MIGTESSDDMRIFANVFKARRIKLGFTQHDVGLDLKQGSQSAFSQTTICRFEAGGLSIKMNRLKPLLTMWL  
RHNDTEHISTLRDTRSPLDNATTRKRKRRTSIPTEGKTRLEDAFKKNPKPTTEEICKFSENKMDREVVRVWF  
FCNRRQKEKKATVEIVQRDVA

### **Pou-Phylogenetic analysis**

Protein sequences used for phylogenetic analysis were downloaded from the NCBI database or determined in this study. POU protein sequences were aligned using the ClustalW algorithm in the MEGA7 application [1]. Phylogenetic analysis of POU family members was performed with the software RAxML using a maximum likelihood method, the JTT substitution matrix, and empirical frequencies [2]. RAxML software was accessed using the CIPRES Science Gateway (Creating the

CIPRES science gateway for inference of large phylogenetic trees. In: Proceedings of the gateway computing environments workshop (GCE), New Orleans, LA, USA; 2010. p. 1–8.) and trees were visualized using the Interactive Tree of Life website (Letunic I and Bork P (2006) *Bioinformatics* 23(1):127-8 Interactive Tree Of Life (iTOL): an online tool for phylogenetic tree display and annotation).

1. Kumar, S., G. Stecher, and K. Tamura, *MEGA7: Molecular Evolutionary Genetics Analysis Version 7.0 for Bigger Datasets*. *Mol Biol Evol*, 2016. **33**(7): p. 1870-4.
2. Stamatakis, A., *RAxML version 8: a tool for phylogenetic analysis and post-analysis of large phylogenies*. *Bioinformatics*, 2014. **30**(9): p. 1312-3.

### **qPCR primers:**

actin Forward: AACAAAGAAATGCAGACCGCC  
actin Reverse: GGCCGATTCCATACCCAAGA  
PCR product length: 146

cyclin b Forward: CCCCGCATGAGAACCATACTT  
cyclin b Reverse: GCAAGCTGTAACCTGGTGCG  
PCR product length: 146

Integrin-alpha-6 Forward: GGGATAGTAGTGCTGACGGC  
Integrin-alpha-6 Reverse: CAGCGATGTCGGGATAACCA  
PCR product length: 156

Pou3 Forward: CGATCTGTCGATTCGAGGCT  
Pou3 Reverse:GGTTGCGTTGTCTAATGGCG  
PCR product length: 146

Vasa Forward: ACTGTTGGATCTCAGCCGTG  
Vasa Reverse:TCTGGCTCAAAGCCCATGTC  
PCR product length: 153

Notch 1 Forward: GAACTCACTGGAAGGTCGCA  
Notch1 Reverse: ACACTCCACCAACAGCGATT  
PCR product length: 145

Notch2 Forward: TGCATGAGTAGCCTGGAACG  
Notch2 Reverse: AGGATCTTGTACGCCATCAGC  
PCR product length: 158

Hes1 Forward: ACTTGGATACGGGTGTGTGC  
Hes1 Reverse: GTCAACGTGTTTCCGCCATC

PCR product length: 155

Frizzled 5/8 Forward: GCGGAACAAAACCTGCAAGA

Frizzled 5/8 Reverse: TTTCTTCCAAGGCAGGGCAA

PCR product length: 156

Dishevelled Forward: AACCTCGCTATCGCCACAAA

Dishevelled Reverse: TGATGCATGTTGCCATTTCGT

PCR product length: 154

Beta catenin Forward: AAGATGACGTAGAGCGCACACA

Beta catenin Reverse: GTGCTGCTGGGATTCTGAGT

PCR product length: 158

piwi1 Forward: ACCAGGAAGCGACTGACTTG

piwi1 Reverse: GGAGCTCGTTGTCCCAAGAA

PCR product length: 156

Piwi2 Forward: TAGGGCGTGGGACACTTTTC

Piwi2 Reverse: GAGTGCAGTTCCACTCGACA

PCR product length: 149

FISH probe cloning primers:

Integrin alpha 6 Forward: TGGCGTTGTAATCGTCGTGA

Integrin alpha 6 Reverse: TGAGCAGTGCATTTCCCGAT

PCR product length: 764

Vasa Forward: TGTCCCGTGAAGTGTCTAGT

Vasa Reverse: TGCAAAGTTGCGAGCCTCTA

PCR product length: 833

Histone 3 Forward: GCGGTCGTCTACACACTTCG

Histone 3 Reverse: CACAAGGATTGGGTGGCTCT

PCR product length: 565

Notch1 Forward: AGGCACTTGCATTGACGGTA

Notch1 Reverse: CCTTCACACCTTGGTCCCTC

PCR product length: 792

Notch2 Forward: AAGTGCCTCCGTTCAAGCAA

Notch2 Reverse: CCCTGGTTACACCGGCATTA

PCR product length: 653

***B. leachii* Piwi mRNA sequences:**

*B. leachii piwi1*

GATCTGTTGTATTAAGGTTGCTGCAGAAGTATATGTAAAGTAAGCAGTTGTTTTATGGT  
TGAATAATGGCTGAGCAAAGG  
GCGAACCAGGAAGAGCGAGAGGAAGATCTCGTGGACGAGGCCAACCCCTAGTACCTGAT  
GCCTCTGCTCAACAACCTGC  
TGTGGGGAGAAGAGGAGGATCAGATGCAGAGGTTGGAAGTAGCATGATTGGCTCAGGCA  
GGGAATGCAAAGGGGTTTGC  
ATCATTCCACACAAGGACCAAGGGGTGATGCCGGCGTCCGAGAAATTACTAGAGGAGTT  
GGCCGCATGACTTATTCTGGT  
AACCGTCAAGTCATGCTTCTTGGAGCAAGGAGAATGTTGGACCCATCCATTTTTGATACT  
GGCACAAGGCCAGATCACAT  
CAAGGACAAAAGAGGAAAGGATGGAAAGCCTGTTTCAGATCTTGACTAATTACTTTCCAC  
TCGTGTCATCCAAAGCATGGC  
GTTTATATCAATACAGGGTGGACTATGAGCCAGATGTCGACCATAAAGGGGCACGCCGG  
GGAATGCTCAGGGATCATCTA  
GATCTGATTGGCAATACTTATATGTTTGATGGATCAACTTTGTACACATTGAGAAGACT  
GCCAGAAGAGGTCAACATCGT  
TCACTCCAAAAGACTTTCCGACAATGCAACGATCCAATTGAAAATCGCCAAGACTGCTGA  
GCTACCGCCAAACTCGCCAT  
TGAGCATTCAGCTTTACAATTTGATATTTTCGCAGTGTATTGAAGAAGCTTGGGTTGGAG  
CAGGTTCGGCCGACACTACTAT  
GATAGCCAGGCCAAGTTTACCGTCAACTGTGACAATATGAGATTTGAGCTGTGGCCTGGT  
GTAATCACAAGTATTCTACA  
GTATGAGAAAGAGAGCGTCATGATGTGCACTGAAATTTCCATAAGATGATGCGGGTAG  
AAAGTGTCTGACCATTATGA  
AACAAAAATATGAGCAGTCGAGGCAGAGACGAACCAACTTCCATCAGGAATGCCAGCAG  
TTCTTGCTCGGACAAATTGTA  
CTAACACGGTACAATCACAAAACATATCGTGTGATGGCATCGAGTGGAAGATGAATGT  
CTCAATGAAGTTCAAAAAGGG  
AGACGAGGAGATTTCTATGTTGACTATTATAAAACGCAATACAACATTACGATTAAG  
AGATGGATCAACCTCTGTTGT  
TGTCTCGTCCAAAGAAAAAGGAAGCTAGAGATGGACTGGAAGCGATTCACTTGGTGCCC  
GAATTATGTACTGTGACTGGA  
CTATCAGATGAGCAACGGGCCAATTTCTCTGTGATGAAAGCACTCGCTGAACATACCAA  
CAGGGACCTGCCAAACGTGT  
GAACGCTCTGAAGAATTTTATTCAGAGAGTGTGCGGACACCAGGAAGCGACTGACTTGC  
TTAACAAATGGGGGCTTCATT  
TTGAAAGAGATTTGGTAGGAGCACCAGGTCGCGTTCTACCTCCAGAGCAGCTCATGTTTG  
GAGAGCGTAAGTGCATCAAT  
GGAGGTCAGTATGCTTCTTGGGACAACGAGCTCCGCAACTGCAAGCTACTGAAATGTGTG  
GACCTCCGAAATTGGCATCT  
CATCTGTCGACAGGACCAGCAGATGGCGAACGGTCTGATTCAAAGATGTGCCAAGT  
TTCAAAAATATGGGTTTTG

ATATGTCGCGCCCTGTTTTGACTTGCATCGAACAGGACAGGACTGATGTGATTCTGAGCA  
CCATTAAGACATATGTGCC  
AAGTCTAGCAACTGTCAATTGATACTTTGCCTGCTGTCCAGTGATCGAAAGGAACGCTAT  
GATGCTATCAAGAAAGTGTG  
CTGTGTGGATGTACCGATTCCCCTCAGGTGGTCAAGACCAAACAATCTCGAAACCTCA  
GAGACTGATGAGTATTGCAA  
CAAAGATTGCTATACAAATCAACTGTAAGCTTGGAGGGGAAGCGTGGGCTGTGAATATC  
CCGCTTGGTGGTACAATGGTC  
ATTGGAATCGACACTTACCATGACTCTATCCATAAAAGTCAGAGCGTCGGTGGGTTTGT  
GCCAGCATCAATCGAGGCTT  
CACCAGATGGTACTCATCCACTACAACCCAGCAAGCAGGTGTTGAACTCATTGACGGATT  
AAAAGTCTGCATGGTCGGGG  
CCCTGAAAAAATACAGAAGTGAGAATGGTGAATATCCGAAAAAAGTTTTCGTATTCCGC  
GATGGTGTGGTGTGGCCAG  
TTGTCCATGGTGAGAGAACATGAAGTGCCTCAAGTCATCCAATGCTTGAGAGACCCGTCC  
AATCCGAATGCCAAACCTAT  
TCCACTGTCTTATATTGTGGTGAAGAAGCGCATTAACACGAGACTTTTCACAAGTGGTA  
GACAAGGCATGGCAAACCCAC  
CTCCTGGCACCATTGTTGATGATGTTATAACTCGTCCGGAATCGTATGATTTCTTTGTGG  
TGAGCCAGAATGTGCGGGAA  
GGGACTGTGTGCCTACACACTACAATGTAATATTTGATGAGTCCGGATTGGCTCCAAAT  
CACATGCAACGCTTGGCATA  
CAAACCTGTGCATGTCTACTACAATTGGCCGGGCACAGTGAGAGTTCCTGCTCCATGTCT  
GTATGCTCACAAGTTGGCTT  
TCCTTGTTGGTCAAAGCGTCCATCGAAATCCTGCAGCATCGCTGGCTGACAAATTGTATT  
TCTTGTAATCATGTATCAAG  
TGTGCTTTTCTCATAACGGTGTGCCTTCGTTGATAGTTCCAGTTTTTATCATTTTTGACA  
CAAGGTGATTTGATCATGTA  
TAGTGATAGCAGCTATAACAATTCTGTTATTTCTTGAGGTTTTGAACTGTTCCCTGTTTG  
TGCCTGCTTTTTCTTGAG  
CTGGGCGCGACCAGCCTGTAATTCGCCGATTGTGGGCGATGCCGTGTTGTGGTGTGATT  
TCTTCGCTTGAACTGGCCG  
CTTGGTCAACTAGGGGTGCCTTTTATATTCATAAATGTGAAATTGATAATTGGATTGGA  
TCTGTTACGAGCTAACGATAA  
ACTGCCCATTGATGCTGAACTGTTACATTCGCCAGTATGTGGTGTGATTCTTCGCTT  
GAACTGGCCGCTTGGTCAA  
CTAGGGGTGCGTTTTATATTCATAAATGTGAAATTGATAATTGGATTGGATCTGTTACG  
AGCTGACGATAACTGCCCTG  
ATTCAGGCCGAAGTTACATTCGCCAGTATGTGTGTAATCGTTTTATGTAAGTTGGCGA  
TTGTAACGTTTTATGATATG  
CTGTGTTGGTTGGATTTTCGTTGGTGAATGAAGCTTGTCTGTCATGATTGCGTTGTTGCT  
AGCTGGTCTTATTTGATGAC  
AAGCGGGTGCACCTATTTTAGTTGGTGTGGAGTTTACGGGACTTCGGAAAAATTTGT  
CCCTGATCACGAGGTTGATAC  
TTTACCTCGTGAATTATTGCAATGCGATACGAATCCATTCTAGAACCGCCGCTGGTTGCG  
GATGGTACGGATTCCCTTT



CAGTTCATAATAATTTTTTTGTTCAAGTAGGCCTATCGATTCAGCGTCGACTTATTAGCAT  
GAAGCTAGTAGCATTAGCAT  
GCCACAACAATCGTAGTCCACGATTTAGTCGGCGAAACGTGTCCATCCATAATCCTAATG  
CAATAACGATCTGTCATCAG  
GTGCACAAGCCCCATTTCAAGGATCCGGATATCAAATCCGGGCGGCCCTTGAGAGAGGTG  
GCCTGCTGAACATTGGATTG  
AGTTGCTTTATTAGAAATGTAAAAGCCTACACTACGTACGACCTAGACCCTGGCGTTTCG  
TTCTCACGGGAAGTGAGAAA  
ACCCGCCCCGAAGTAGCTTCCGTTTCTCATTCACTCTGGTTTTTCGATATGGGTATTAGAT  
GCTAGGCCTATTACTATTGG  
TCTGCAAACAGCCTACATCTAGACTAGCTCTGTGCTTGTCTTGGCAGTTTTAATGCAAC  
AAGCTCGATTTCTTCTTTGT  
AAATGTTAGGACTGGTTCAGTGGTGGGAATTCACCTTTTTGGCTATTTTCAGGGCATTCT  
GTGGAACCTAAACTAAGCTC  
TGTTGCTACTATAAGCTAGGCTAGGACCGTGTATAGTCAGCTAGAGAGGGC

*B. leachii piwi 2:*

CCGAGATTACTGCAATCTCTGCCGTTGCAGGGTCCCTTGACACTCCGTCGATGTTTTCTC  
TGAATATAAGCCAAATTCTC  
TCTCAATAAAAAAATGTATCGCGAATTTTTTTGATTTTACAATCTCTTCGCTGCTGCCTT  
ATTGTTTCATTTTGCATGGC  
TTCCTCTGTCCCAGCCAATGTCCGGTCGATAAAGCAGACCTATCTCATAACAGGTACCGCGC  
CTACAGTTCAACACCACAG  
CCTAATCAGAGAAAACCCCTATGTTATATGACCCAATGATATATATGACAGATTAGAGA  
GTCTGTAGGCCTACTGCCAGA  
CCAGTGGCCGATGTTAGGCCACCTTTTCGAACTAGAACGGCGCAACTCCGTTGCCTATCC  
ATGCGGAAAGGACTGAAGCA  
CTGAGCCGAATCGTCCGGATCTTTGACACGGGGCTCTACACAAGATGGCGTGCGCGTACC  
GTAGACAAAGACCTAACTGT  
TCCAGGTCCCACGTGATGGACCCACCTGGTAGTGAACCCTGAACCGTTTGTGGTTTGT  
GACTTGTTGAGCACAACGGA  
GAAAAGGAAGTGGTACAGTAACTGGAAGGTGAATTAGTGAATATTTTCGTTTATTATCGC  
CATTTTGTGCTTTGAGGCGGA  
GTTTATCCCGCGGACTATCCATCGCATCCGCATCCCGTTGAGGGCAAGCCCTCATTTTCCT  
TGATGCGAATGCATAGCTGT  
TTTTCTATGTTGCTAGTAGCCTACGGGTGGAAGTTGTTGGTCGTTTGAATACTGCTTGC  
CCATATGTAAAAGTAGTAGG  
CTATGATTAATAATGCCACCCACTACCAAAAACATCTAAGCTGGCTGAGAATTATGCAATCT  
AGTCTACCCGGTGTGCTAGT  
CATGTTCCGCCGAGAATCCGACCACCGTTTTGATGGGATAGATGCACTTGATGCAAAAAC  
ACCTCAAGTCAGTCCACGCA  
ATGTACGGATACATTTTGTAGATCAATGTTTCAATTGAGTATCCGCACCCTAACACGGTCT  
AGCCTTGGCTTGTAGAGTTT  
ACCAAGTTACAAAAACGTGCGCTTTGTGCGCCTGGAGCCCCAAAAATGTAGCAATAGGCTA  
CAAAATGTACTGCTTATCCT

TGTGTTGAGAGCCTTGAAAGTACTGAAATGCGGAGGATAAGTTATGACGTCATATTGAT  
ACATTTTCAAGTGTTACCAAC  
AATGATATCTAGCATCTGCGCACCAATTTTGAGACCAATCAGGTCGGCCCGGTAGAACTC  
AAGTTATAACATAGAAAATC  
ATCTTCCAACACTACATATTATAGATTTGCTGTGTTATGAGTATGAATCTCCACGCTCTGGC  
AATTGTGGCAGCGCCTGGCC  
GCCTGGCTGGGAAGCTACAGTCATCATATTTAACGCACTTAGTAGCATGGCAGCAAGTGC  
CTCAACCAAATTTAAAATACC  
AATACAATGTTCCGGTGAAACTCTTCCAAAGGAATTTTATGTTTGATTTTTGCAAGGCA  
TGCCTTTAAGCCGTGTCCGGA  
TATGTGCGAGTAAGACTGAGCCTGGTTCATCTCATGTAAATACTTGAAAACAGATTTTA  
TGCTTAGTAGCTGTCTGTCTG  
CTTTGAATTGTGTATTTACATCACTTTTGCCTCATTGTACAAGGTTGCAATAGGAATTTG  
TTATGGAAAGCCATGGGCTG  
GGAAGAGGAGGCCGTGGGTATAATGCATTTGGATTGAGTAGTGGCGGCAAAGCCGGTCA  
ACCCAATGAAAGTGAAGAGTC  
ACAAGCAGGAAGAGGTGGTTTGTCTGTTTCCAGGGCGTGGGAGCATTGGAAGAGGGGCAT  
CTTTACTTCGGGGAATGAGTC  
GACCAGGTCCATCTGTAGGGCGTGGGACACTTTTCCAAAAATTACTGGGGCCTTCTGTCTG  
GAGACAAAAGTGAAAGCTCA  
TCAAGAATAAAAGCTGATGTGTCTGATGGCCGTAGCAGTAACACAGAGTCAATTTCTGA  
AGATTTGTCTGAGTGGAAGTGC  
ACTCACATCAAATGAGTCATCAAGTCGTAATCGAGCCAAAACAGATTCAGGATTTTCATC  
AAACTCACTCGAGTGGAGGAA  
TCACTGGTGCCAGCGGTTCCGTTCAAGTAAGACCACCACCAGCATTCCGACTCATGC  
AGACAGCATTCAAGTTCAGTC  
TCGCTTGGCAGAGGTTTCAACGTGCCAGCTTAGGAAGAGGTCTTCGTATGTCTGGTGCA  
AAAGCACCTATTGGAGTCAC  
TACATCAGTTGGTCCAAAATCGACGGGCACGTTGTTTGAAGGTGGTGTTCAGACTCCAAG  
ACAAACAGAACTGGTCGGT  
TTGAGGGTCCAAAAGAGAGTGAAACAGTTGTCCCAAGTCCACAGAGCTCTAAATCAGGA  
GAGACTGTTGAACCTATCCAA  
ACCCTGCCTGCATCTAAAACACTAGGTCCCCAGAAATGAGGCAGCCGAGAATGGGTTTGTG  
CCTGGGAGGAATATGTCTTC  
TGGTAGAGGTGTGACACTCCCTCATCACAATTAGAACCGACTTTGGGAAGTGCATCAAT  
AAGAAGTCTATCTACTTCAG  
AAGCATCGGCTACTCATGAAAGGCCAATGAAACATGATCCACCTGTTATGATGGAAAGG  
GCAGTCACTGAGTATCATGGC  
AATAGTGGTGTGGAAATCCCAACACGTGTCAACTGTGTTTCGTGTAAACTGCAGGAACCCT  
GTCATTTATCAATATCATGT  
CACTTTCAAACCAGATGTTGATAGTAGACAACCTTCGGTTTTCTTGATCAACCAACACAG  
GGAGTTCATAGGACAGAAAG  
CGTTTGATGGTGCATTGCTGTATCTAACTAAAGATATTGGTCAAGACACAACGCTGATT  
TCAGAAAGAATTACAGATGGT  
GCCAAAGTTAGCTTGAGAATTCAAATGACAGCGAAACTGAACCCGGCATCACATAAGTT  
GATTCATTTTACAACGTGGT

AATGAATAAGGTCATGAAAATACTCAAACCTTTGCCAGTTGGACGAACTATTATGATC  
CAGCATGCCCCAAGTCTGTTG  
AGAAATACAGGCTTGACTTATGGCCTGGATATGTCACTGCTGTGAGGGAAATGGAAGGC  
GGCCTATTCTTGAATATAGAC  
TGCTCTTTTAAGGTTCTTCGAAATGAAACAGTACTGCAACAGATGCAAGAATTGTATAG  
AACTTGCAAAGCTGACTTTCCG  
CGCAAGTTGCATTAAGGAATTGGTTGGAGTGACAGTGCTGACACGCTACAACAATAATA  
ACTATCGCATTGATGATATTG  
ACTGGTCGCTTTCTCCAATGAGCACATTCACAACCTCAAAGGTGAAACCATCAGTTTCT  
TTGACTACTATAAAAATCAA  
TATGGAATTGAAATAAAGGATCTTAAGCAGCCAATGCTGATCAACCGGCCTAAAAAGGC  
GACTCAGAGACATAACCAGAGC  
TGAGAAGGGTGAGGAGCGTGTGCTTTCTCTAGTACCGGAGTTATGCTGTTTGACGGGAA  
TTAGTGATAAGCTCGCTGGAG  
ATTTTTTCAGCCATGAAAGACATTGGAGCAATCACTAGAATGGGTCTGTTGACAGAAAT  
CTGCATGTTGAGCAGTTTTTG  
AAAAGAGTCAATTCATCTACTGAAGCAAGAGGAGAGCTGTTGAAATGGGGATTAGAACT  
TGAATCCACTTGTGCTGCTGT  
CAAGTCTCGGGTTCTACCTGGAGAGAAAGTCATGGTTGGTGAAACAAGGTATTCCAGT  
GCAATGAGCAAGTGGACTTTT  
TCCGTGACATATCCCGTGCTCCAATGTTGAGATCGGTCCCATTAAGAATTGGATAATCG  
TGTTCACTTCTAGAGATCAG  
TCCAAGGCAAGAGATTTTGCAACCAAATTTAATGAAGTCTCGAGGTGTATTGGAATGCA  
AGTACATCCACCTGAGTTCAT  
TGAACTGAAAAGCGATCGTAGTGATGAATTC AAGCACGCAATTCAGGAAACATAAACA  
ATAACCTTCAACTGGTTGTTT  
GTATCTTTCCTACTCTTCGTGAAGATCGGTACAATGCGGTAAAAAGACTGTGTTGTGTTG  
AAAAGCCTGTACCCTCGCAA  
GTCATAATATCTAAAACCTTTGCCGAAAGATGCCAAGATGGGCAAGTTTCGTTCTGTAAC  
GATGAAAATCGCTCTTCAAGT  
CAACTGTAAGTTAGGTGGTGAGCTTTGGGCTGTCTCAATTCACCTTGATGGACTCATGGT  
TTGCGGGATTGATGTCTACC  
ATGAAGGGAAAGGAGGCAAAGGAAGATCTGTGGCTGCGTTTGTGCGAGCATGAATAAG  
TTAGTTACAAGATGGCACTCT  
CGAGCAATACAGCAACAATTGCCCAATCAAGAAATCATTGATGGCTTGAAGCAATGCTT  
TTGTGATGCATTAACAAAGTA  
TTACGAGTCAAACCATAAGTTACCTGATCGTATCGTAATCTATCGTGATGGAGTTGGAG  
ATGGTCAATTGTCTGTCTGTGG  
CAGAGCATGAGGTACAGCAATTGAAGGATGCCGTGAAAATGTTCAATGAAATAGCAGGT  
GGTGTATACGCACCTAAATTT  
ACATTTGTGGTGGTTTCAAAGAGGATTAATATTCGTTATTTCAAGAGAGATGGAAATGG  
TCTTGTCAACCCCCACCAGG  
AGCGGTGTTGGATCATAACCGCTACGAGACCAAATGGCCAGACTTCTATCTGGTGTCTCA  
GCATGTTCCGACGGTACTG  
TTTCACCAACGCATTATATTGTTGTTGACGGTTCGAGAATATGAAACCTGATCACTTGC  
AACGGCTTACCTACAAGCTC

ACCCATATGTATTATAACTGGCCTGGTACAGTCAGAGTGCCTGCACCATGTCAGTATGCT  
CACAAATTGGCTTATCTCAT  
TGGTGAGAATATACGAATGGAACCCGCTCAGGATTTGTGCGACCGTTTGTTTTACCTATA  
AACGTTTTCACTGGTCCACA  
GAGATGGTATAAACCTAATTATGAGGTATTTTTAGAATTTGAAATTTTTGACAAATTCC  
TACAGGTTGCACTGGATAGTT  
TTATAATTGCACTCCCTTGACATTCAGTCCGTGGAAGGCTGAGTTTGGATTCACAGCTCG  
ACCCTCCCCGAGTGGGGGA  
TGTGTCGTAGGAAGAGCGTCATGGTGCAAACTACCCCTCAAACCTCATCTTGCTGAACT  
GGATCAAAGCATCCCCTGTC  
CACTACTTTCCCCCTTTTTACAAGCATTTTTTATTTTTTAATCAAGACATTTTTGATCAT  
TGCAAATGACGCCATCTGTA  
AAGTGGACCTGTTCCCTTGATTTGCACACGCTTCAATGTGTGCATGAGCTATGTTATCAT  
TACTTTGATTATGATGGTTT  
TGCCTAAAGCTGTGTTTGCAGTTCATTTATCTCATAGCCTTGTGGATTCAGTTCGAT  
GACAATGGTCCGAAATCATA  
GTTCCACTTTGAAAGTTTTACTTTATTTGGTGAGTCAAATTCGTTATGACTTTAGAAA  
ATTGTGCATGATTGAGTTTCG  
TTTTCAAACCTGCTCCCTGTTATGCTGCATAGTCTGGATTTTGTGCTCTTTTAGAATGTGTA  
TTAATGTCAAATCTGGACA  
AAAAGTTGAGCAACCTTTGGCAATCAGTTAACTACCTGTGTATGACAGGATCGGAAATA  
TAGGACGTATATTTATTCTGT  
CCTTCAATTTGCTGCATATACACAGATAATGATGATAGGCCTACAGACGACATGTGCTG  
CGAATTTGCTTCCTTTTGTG  
AGTTGAATACACGCACAAACAGCGGCTATTTGGGACGTGATCCGTAGGACAAAACCTATC  
TTTCCCTTTGGCCTATCTGTA  
TCGGTGTGCGATATAGCATAACAGCCGAGGCGAGTTTGGTATGTTTCTGCGTCTGATGGT  
TATCAGCAGGGACTAATGTT  
GATGGTGGTGGGGTCTTAAGACAGAAAGACACCAAACCTCTGTGAAGTTTGGATGAGGCT  
TGTATGGCGGAAGACATGAGG  
TTGTACTTTGAGTTTCCCACTGACTGAGGCACTGACCTTATGCTAAAGGTCTAGTCGGCA  
CCGCGAGTATGTTGCTGATG  
CTGTCAAGCAATTCCAGGCCATCGCACGACGCGGCAGACATAAAACCCACAAAGCCGAGG  
CAGTGAGTAGGCCTTCGGTG  
TGTACTTAGTGAGTGCACCATGATAGGTAATGACTTGCAGGCTTTCACACAGCTCGA  
TAAAAGTGGAGCGATAATTG  
ACCGTCATTGTCGATTCCTTGATCGATGATTCAAAAAGATGGAAGAAGCCGTTTTTTAT  
GTCAAGACAAACACGAACAGC  
TTTTGCGAGATATGTCTTGCCATTATGCATTCATTAGTCTTGGTATTGTATAGTAGACCT  
TTGAAGCAGATATGGTTTCC  
GGATGAGTATTTCTGGTTTTTACACATCAACGGCTTACGCCAAGTCACCAGCCCAAGCTT  
CAACAGAATAACGCAGGCAG  
ATTGGCCCCTGTCGTGCTAATTTTTTACGTGTTTTTCCAGGAGTTGTGGCCACAGATGCC  
ATAGTCATAACAATACAGTTG  
TCTAAGACTTTACAGCAGACACTCCTGCGGGAACATGCCGCATCCTGCCAGATGCGATGT  
ACTGATGCGCATCACGCAAT

CTTTGCACGTTGCAACTCCTCATGACTGGTGAAAGCTTGCCGCTCGTTCATTACAATGAA  
GGTAAAATATACCGCTTTTA  
GATTCAGATGTATGCATGTGTACATTTTCTATGTACCTTCCCTTCTCTATAGGCCTGATA  
ACAGCGCCGAGATATCCATC  
CTCTCTGACCACTGAGCCAGGTAACAACCAAGCAACACGAACTCATGTTCGTCACGGGAA  
CTTCGTGTTTCGTTTCGAGGTC  
AAGCTGACGCTGAGTACCAGTACCGTACTGTTCTCGAAAATGTATGCAGCGGGATTGACG  
TGACGTCTTTCCGTGAGGTG  
TCGCCTAGGGATTGCGCGGTGATACGGTAATCAGTCTAATCGTAGAACGTAATCGATGA  
TATACTTCGTTACGGTACAT  
TGCGGCCGTTTTGGCAGCCAGTGGTAACAGGCACACGGTTCTTGTCGCCTAATGTGTAAG  
AGAGTACCGGTACAACGTAT  
TTCCGTTTCGAATGTTTTCGCACCAACTTATGAACGAGATTTCACTTTTAGACGTGTAGCCT  
AGCCTACAACCTGAAATGCT  
CTGTTTTCCGCGAATCTTCGTAACCTCCATTTTCGGGGATATCACAACAGAAGCCGAGCTC  
AAGCAACTAGAACTACCCA  
ATAGGATGAGTCTCGTAAGTTTTTTTTATCTGTTCAACGGGTCCACCGATACAGTACTT  
CACGACAGTTGCGAGTAGTG  
TTTCAGCGAGTCACCATCTGCGCTGTAGGCCCAAGTGGTTATTAGGCTAACGCTAAGCCT  
ATATCTAGTCTCACCGAGTT  
GTTTCGAAAATCGTGGCAATCGTATCTTTGAAATTTTATATCGTCAAATGGGAATCACGA  
AGCACTTTTCGTAACGATACA  
TATCTATGGCAAATTTGACAGCTCATGGGGCATAGGCTATCAGAGCGATCGCTTGTGAA  
AGAAGCAGATACTCACCGCGT  
CGGCTTGGTGTAGATACAGGACCGTGATAACAGCGACGAAAAGTAGTTTTGTGT
